# Supplementary material for: Development of a Framework for Assessing Bitumen Fatigue Cracking Performance under Different Temperatures and Aging Conditions
Source: MDPI journal article supplement (doi:10.3390/buildings14020311), 2024-01-23
Supplement: s1 [file s1]

## Supplementary files.

a) PSE vs N (Temperature 25°C - unaged bitumens)

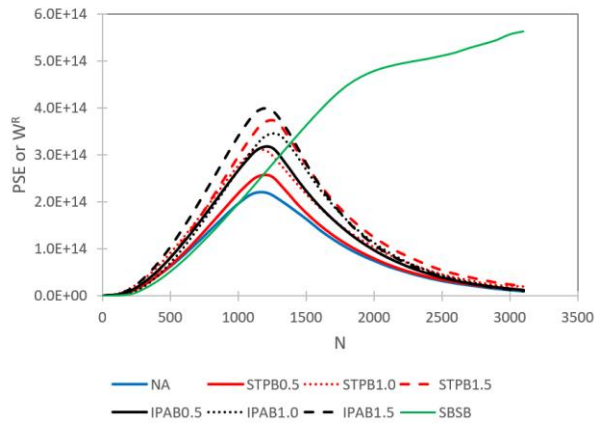

b) PSE vs N (Temperature 25°C - RTFO aged bitumens)

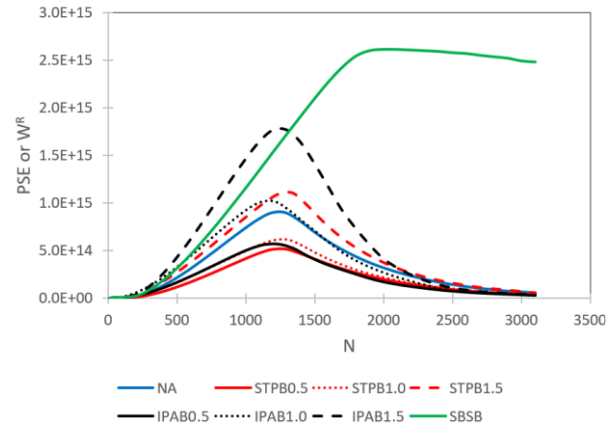

c) PSE vs N (Temperature 25°C - PAV aged bitumens)

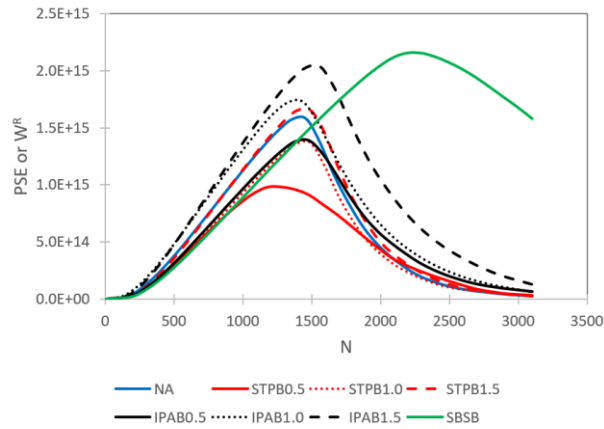

d) PSE vs N (Temperature 28°C - unaged bitumens)

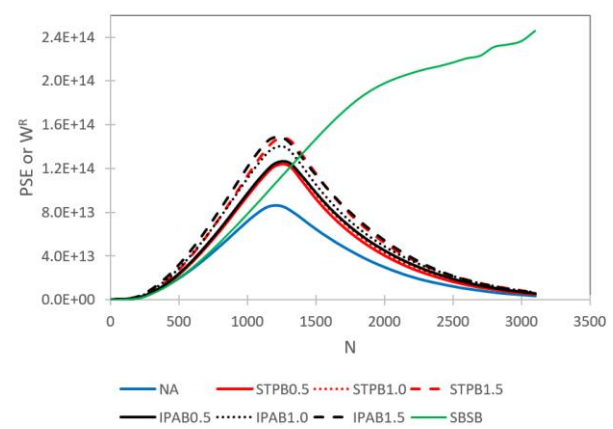

e) PSE vs N (Temperature 28°C - RTFO aged bitumens)

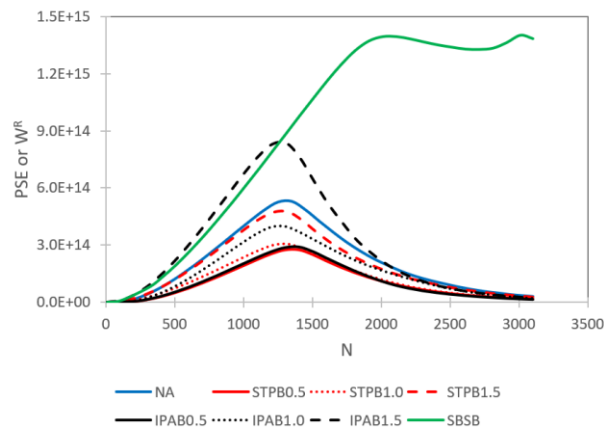

f) PSE vs N (Temperature 28°C - PAV aged bitumens)

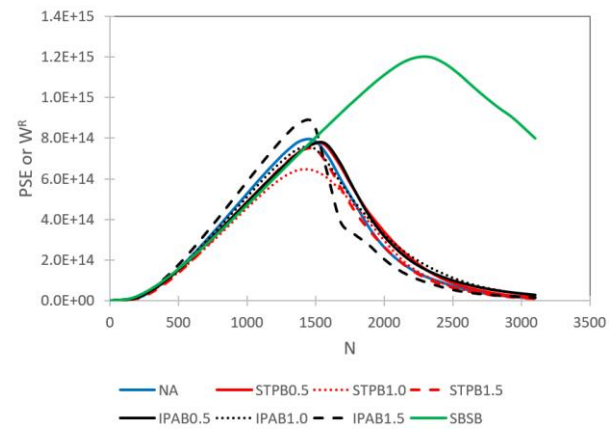

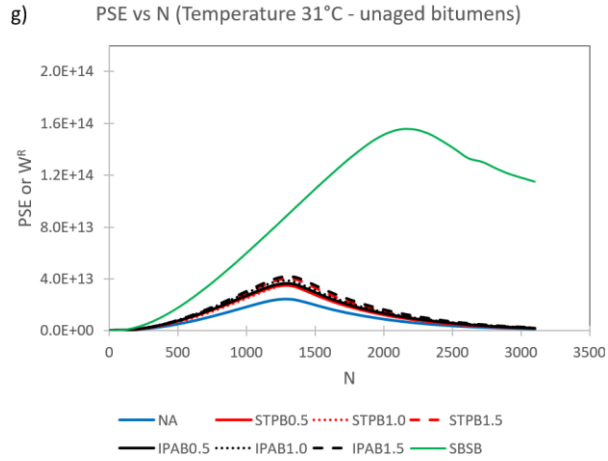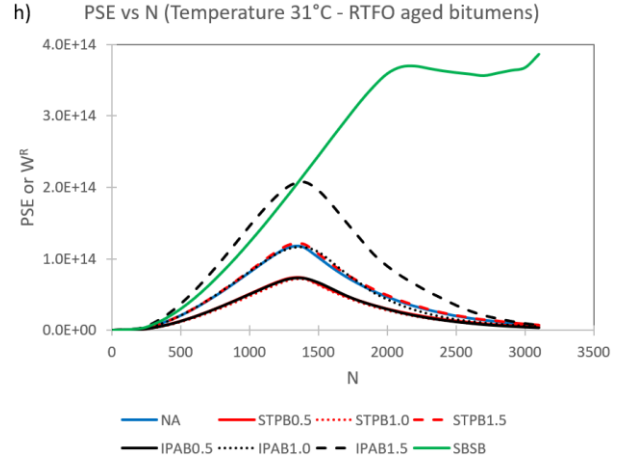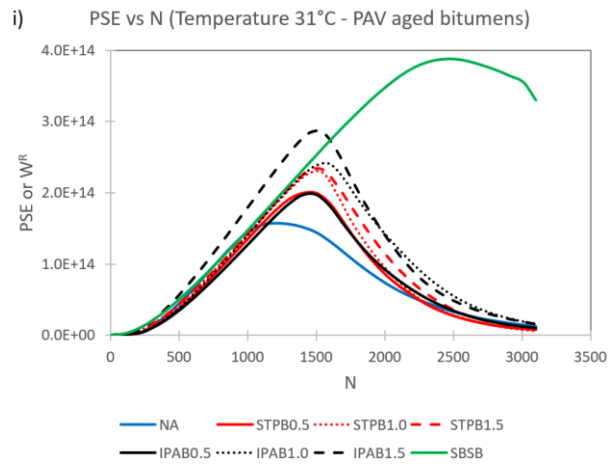

Figure. S 1 Stored PSE curves of bitumens at different temperatures and aging conditions: a) T25°C – unaged, b) T25°C – RTFO aged, c) T25°C – PAV aged, d) T28°C – unaged, e) T28°C – RTFO aged, f) T28°C – PAV aged, g) T31°C – unaged, h) T31°C – RTFO aged, i) T31°C – PAV aged.

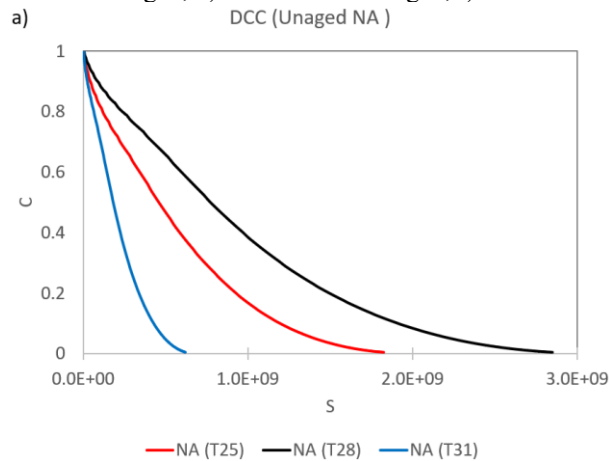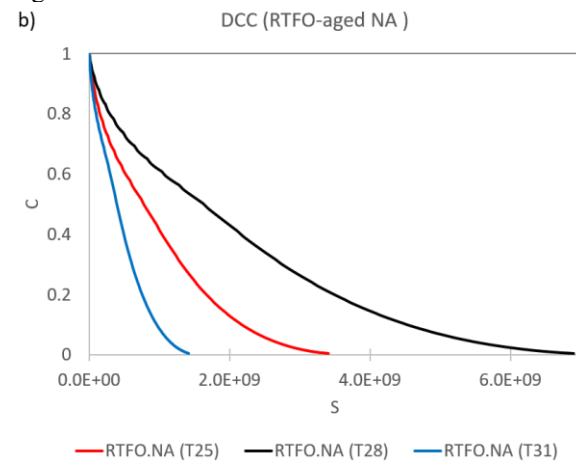

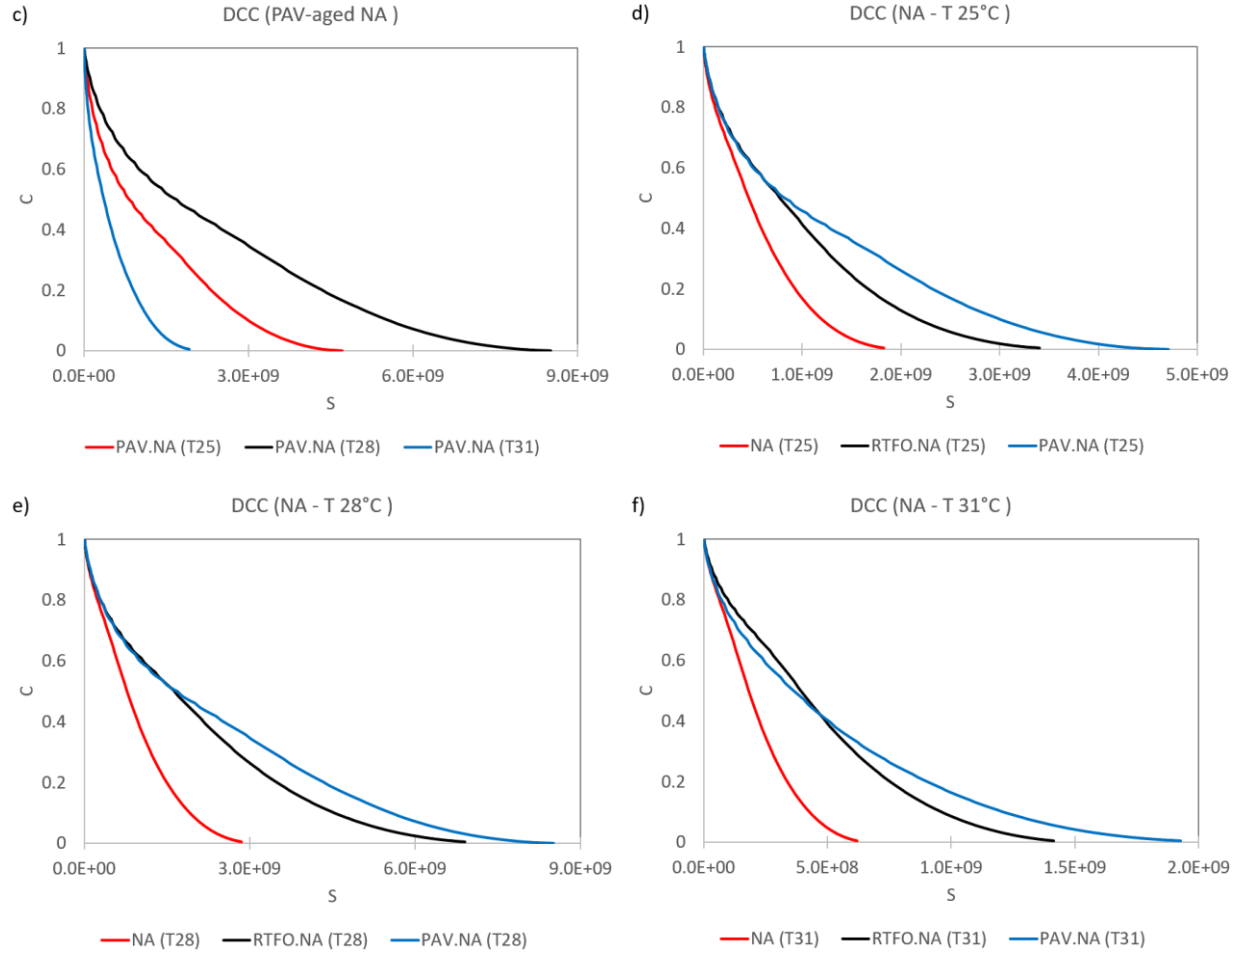

Figure. S 2 DCCs of NA at different temperatures and aging conditions: a) unaged NA – T25, T28, T31 b) RTFO-aged NA – T25, T28, T31 c) PAV-aged NA – T25, T28, T31 d) T25 – unaged NA, RTFO-aged NA, PAV-aged NA e) T28 – unaged NA, RTFO-aged NA, PAV-aged NA f) T31 – unaged NA, RTFO-aged NA, PAV-aged NA.

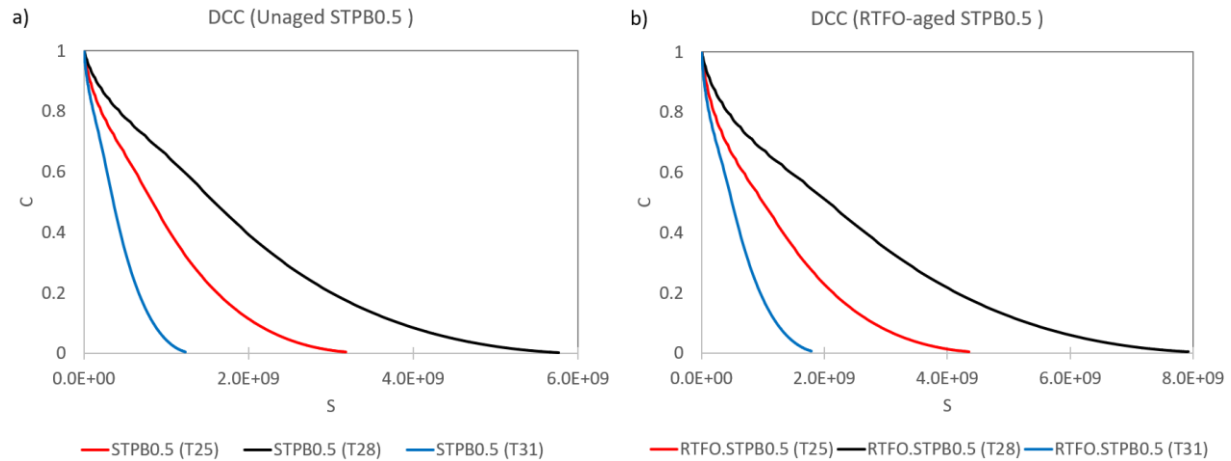

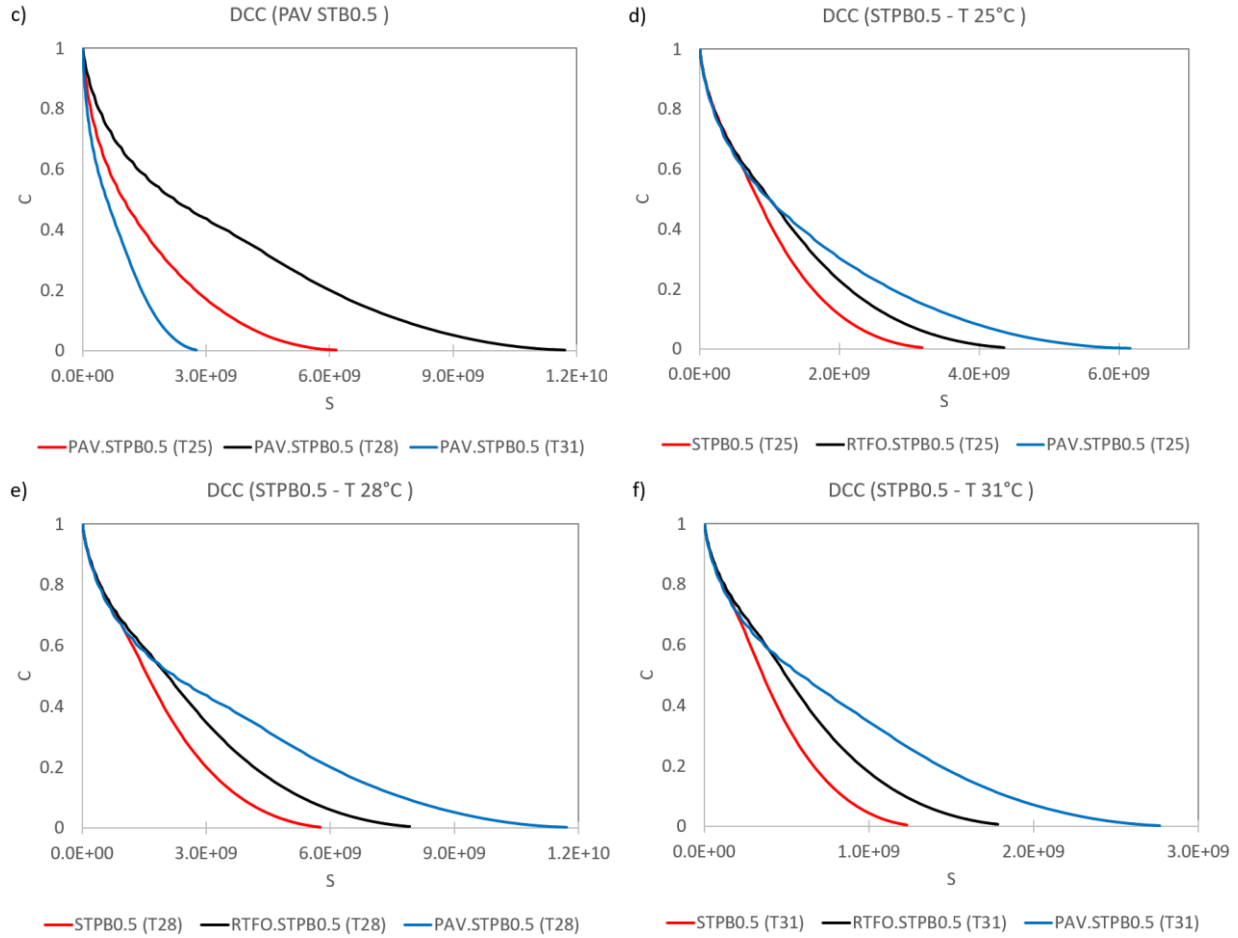

Figure. S 3 DCCs of STPB0.5 at different temperatures and aging conditions: a) unaged STPB0.5 – T25, T28, T31 b) RTFO-aged STPB0.5 – T25, T28, T31 c) PAV-aged STPB0.5 – T25, T28, T31 d) T25 – unaged STPB0.5, RTFO-aged STPB0.5, PAV-aged STPB0.5 e) T28 – unaged STPB0.5, RTFO-aged STPB0.5, PAV-aged STPB0.5 f) T31 – unaged STPB0.5, RTFO-aged STPB0.5, PAV-aged STPB0.5.

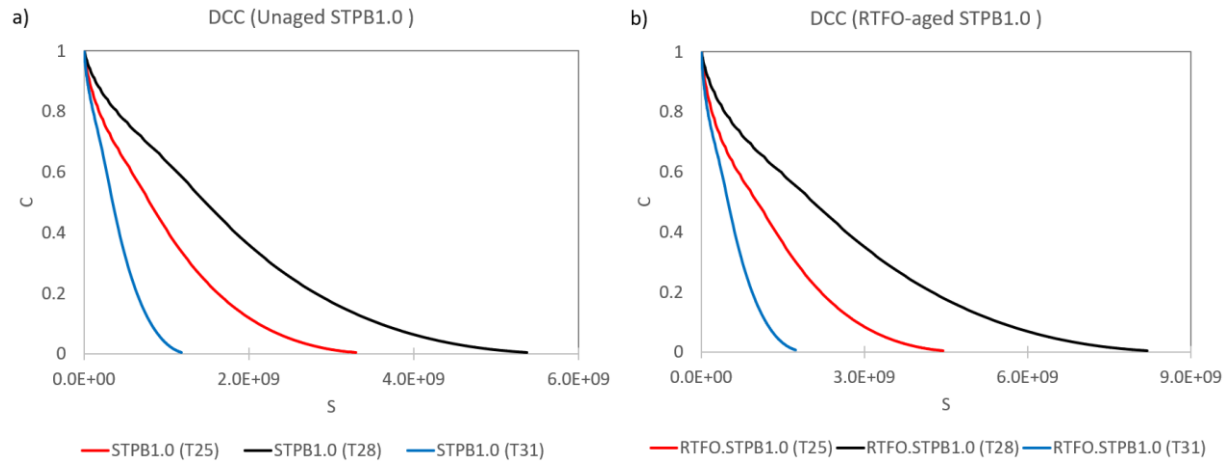

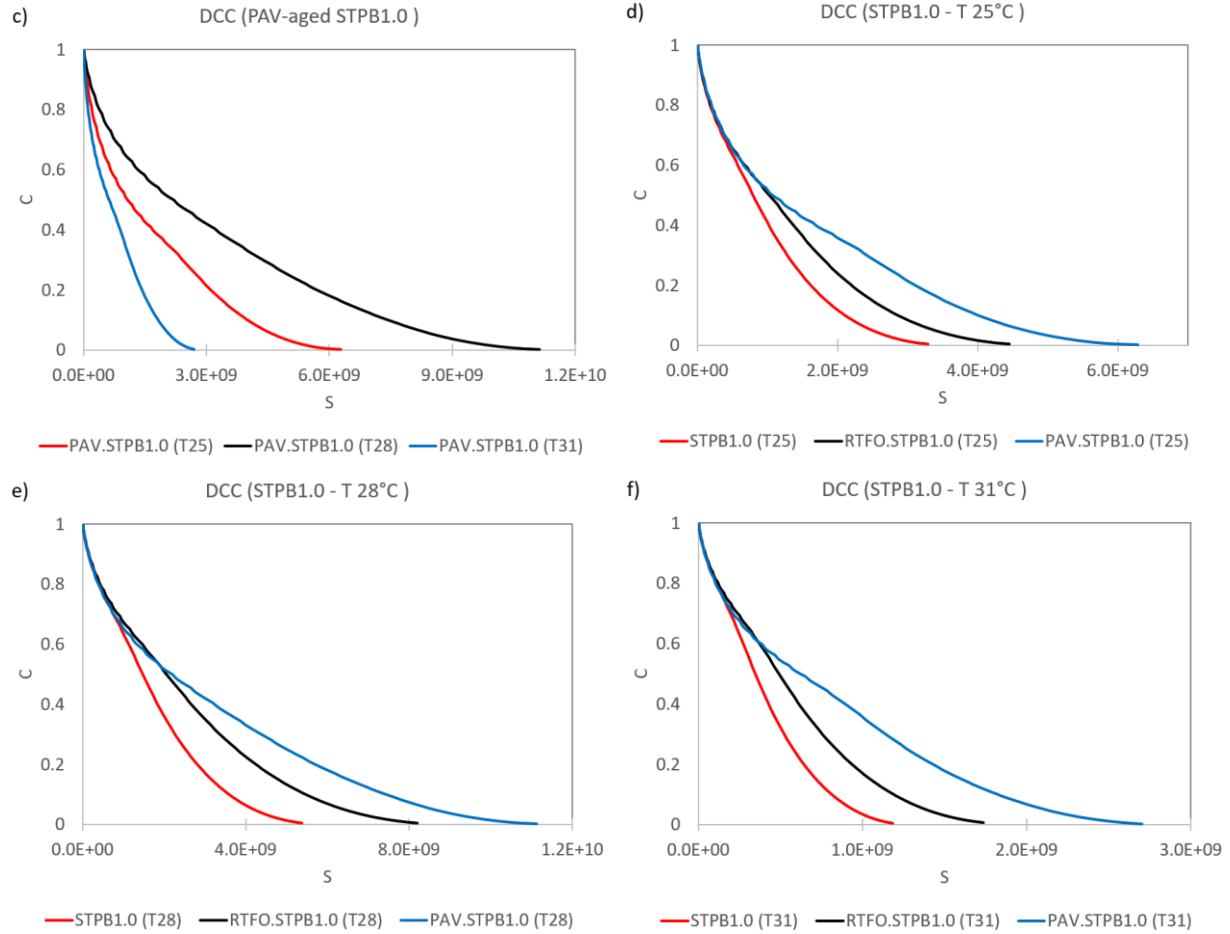

Figure. S 4 DCCs of STPB1.0 at different temperatures and aging conditions: a) unaged STPB1.0 – T25, T28, T31 b) RTFO-aged STPB1.0 – T25, T28, T31 c) PAV-aged STPB1.0 – T25, T28, T31 d) T25 – unaged STPB1.0, RTFO-aged STPB1.0, PAV-aged STPB1.0 e) T28 – unaged STPB1.0, RTFO-aged STPB1.0, PAV-aged STPB1.0 f) T31 – unaged STPB1.0, RTFO-aged STPB1.0, PAV-aged STPB1.0.

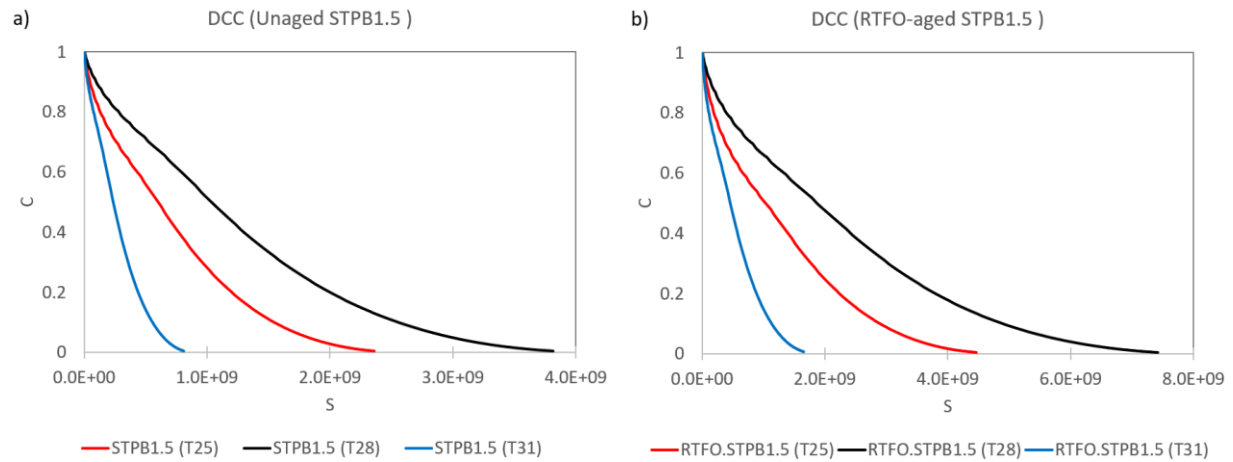

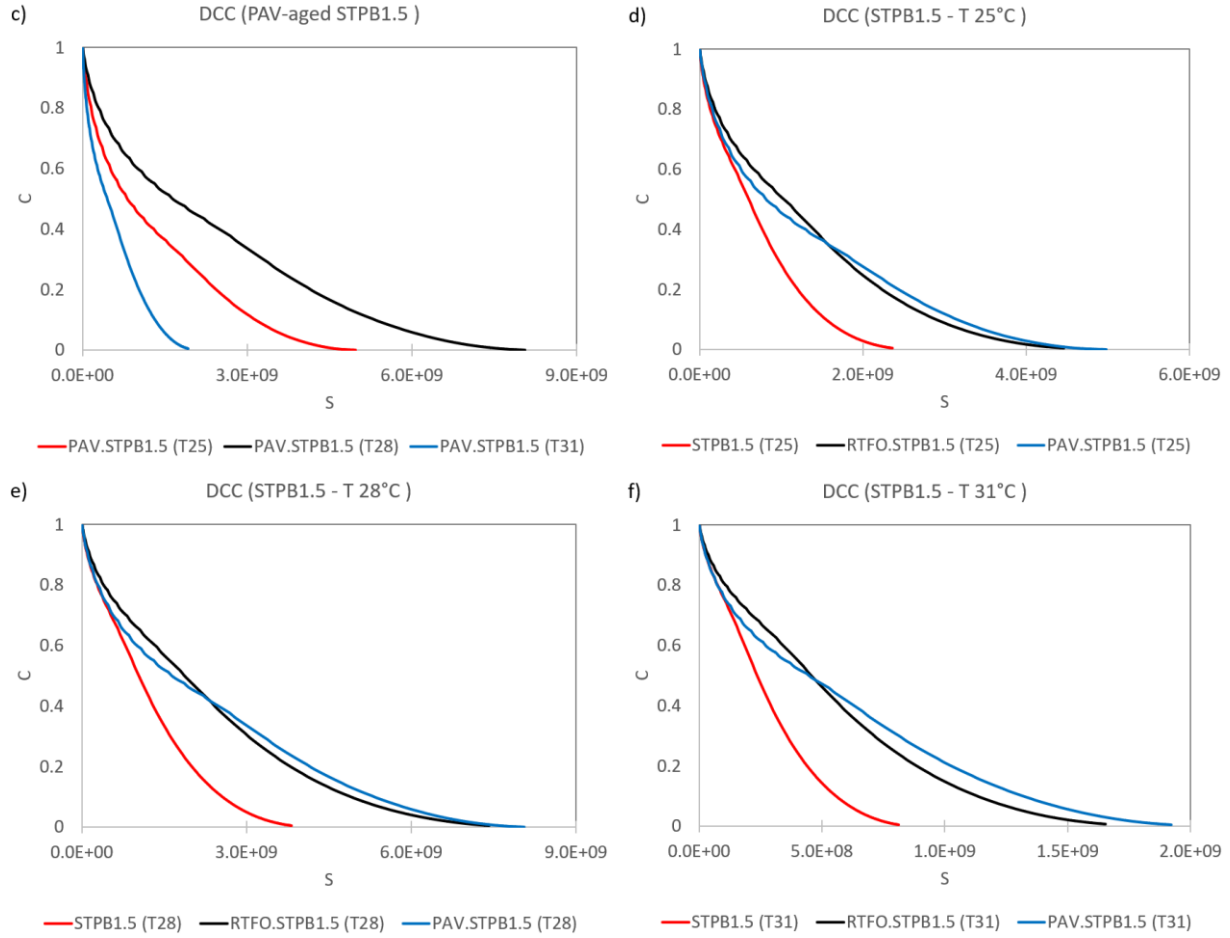

Figure. 5 DCCs of STPB1.5 at different temperatures and aging conditions: a) unaged STPB1.5 – T25, T28, T31 b) RTFO-aged STPB1.5 – T25, T28, T31 c) PAV-aged STPB1.5 – T25, T28, T31 d) T25 – unaged STPB1.5, RTFO-aged STPB1.5, PAV-aged STPB1.5 e) T28 – unaged STPB1.5, RTFO-aged STPB1.5, PAV-aged STPB1.5 f) T31 – unaged STPB1.5, RTFO-aged STPB1.5, PAV-aged STPB1.5.

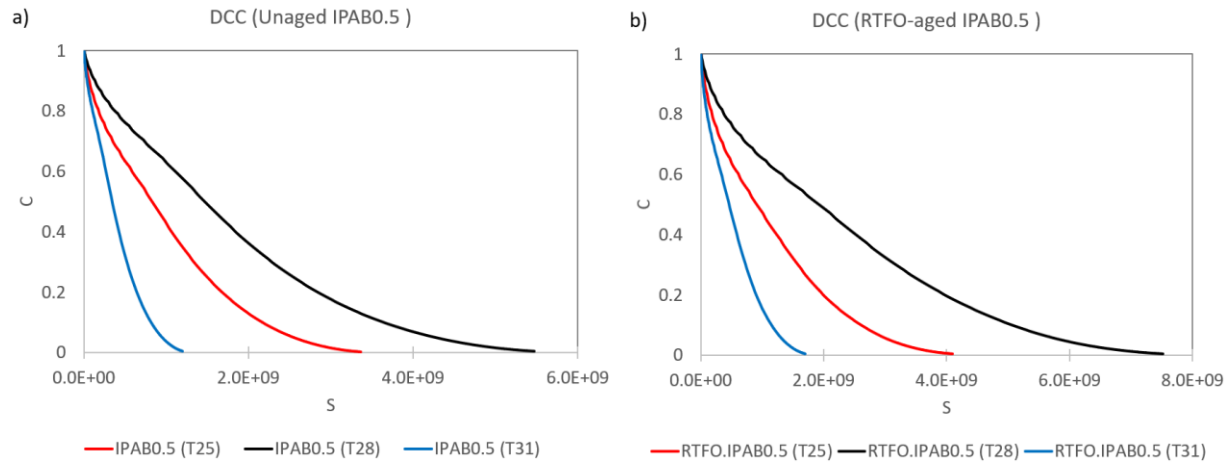

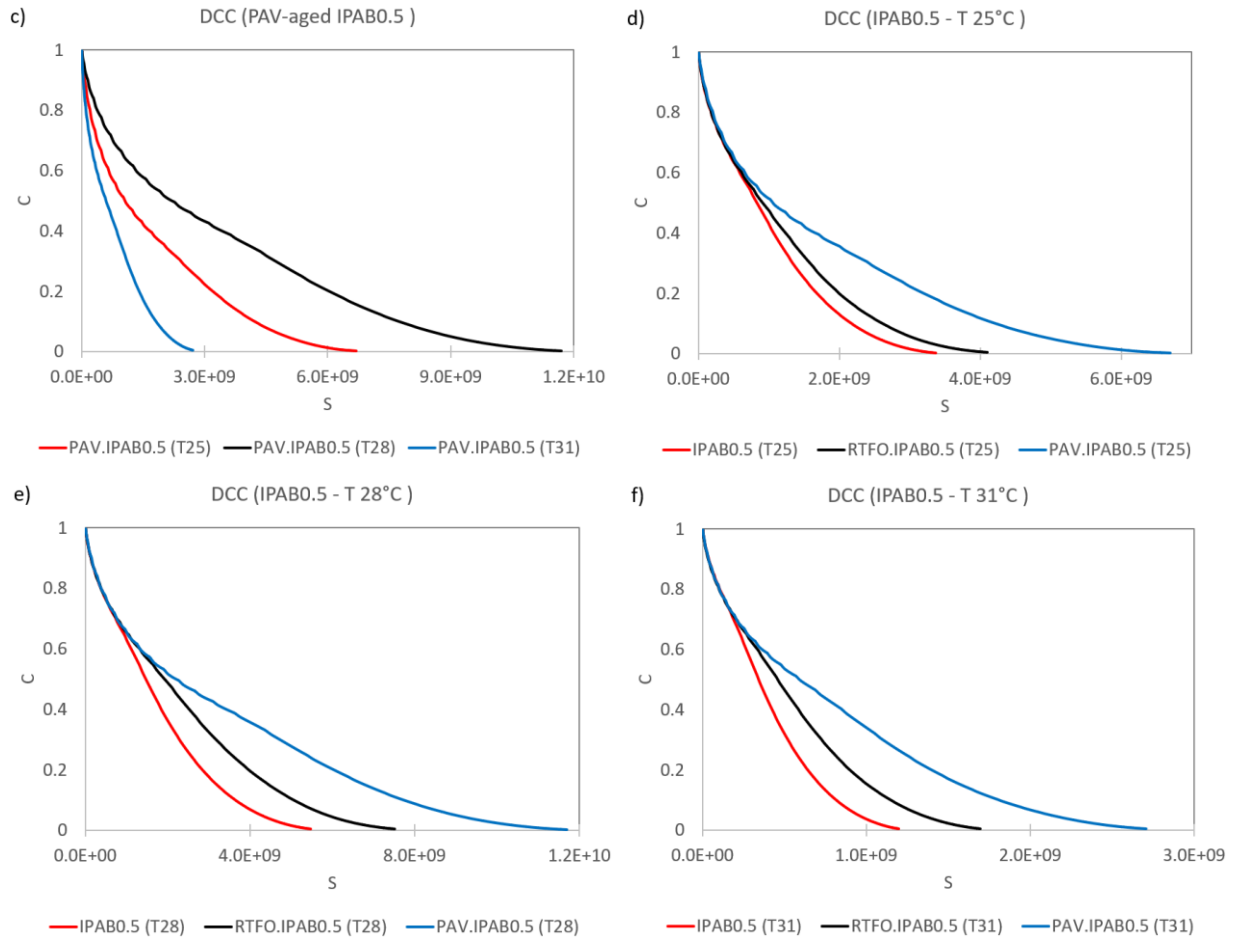

Figure. S 6 DCCs of IPAB0.5 at different temperatures and aging conditions: a) unaged IPAB0.5 – T25, T28, T31 b) RTFO-aged IPAB0.5 – T25, T28, T31 c) PAV-aged IPAB0.5 – T25, T28, T31 d) T25 – unaged IPAB0.5, RTFO-aged IPAB0.5, PAV-aged IPAB0.5 e) T28 – unaged IPAB0.5, RTFO-aged IPAB0.5, PAV-aged IPAB0.5 f) T31 – unaged IPAB0.5, RTFO-aged IPAB0.5, PAV-aged IPAB0.5.

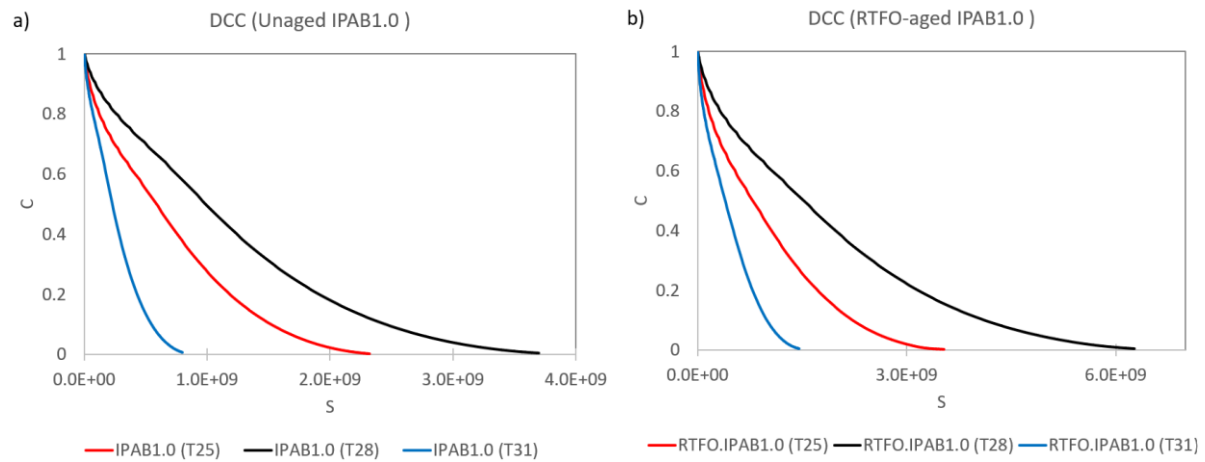

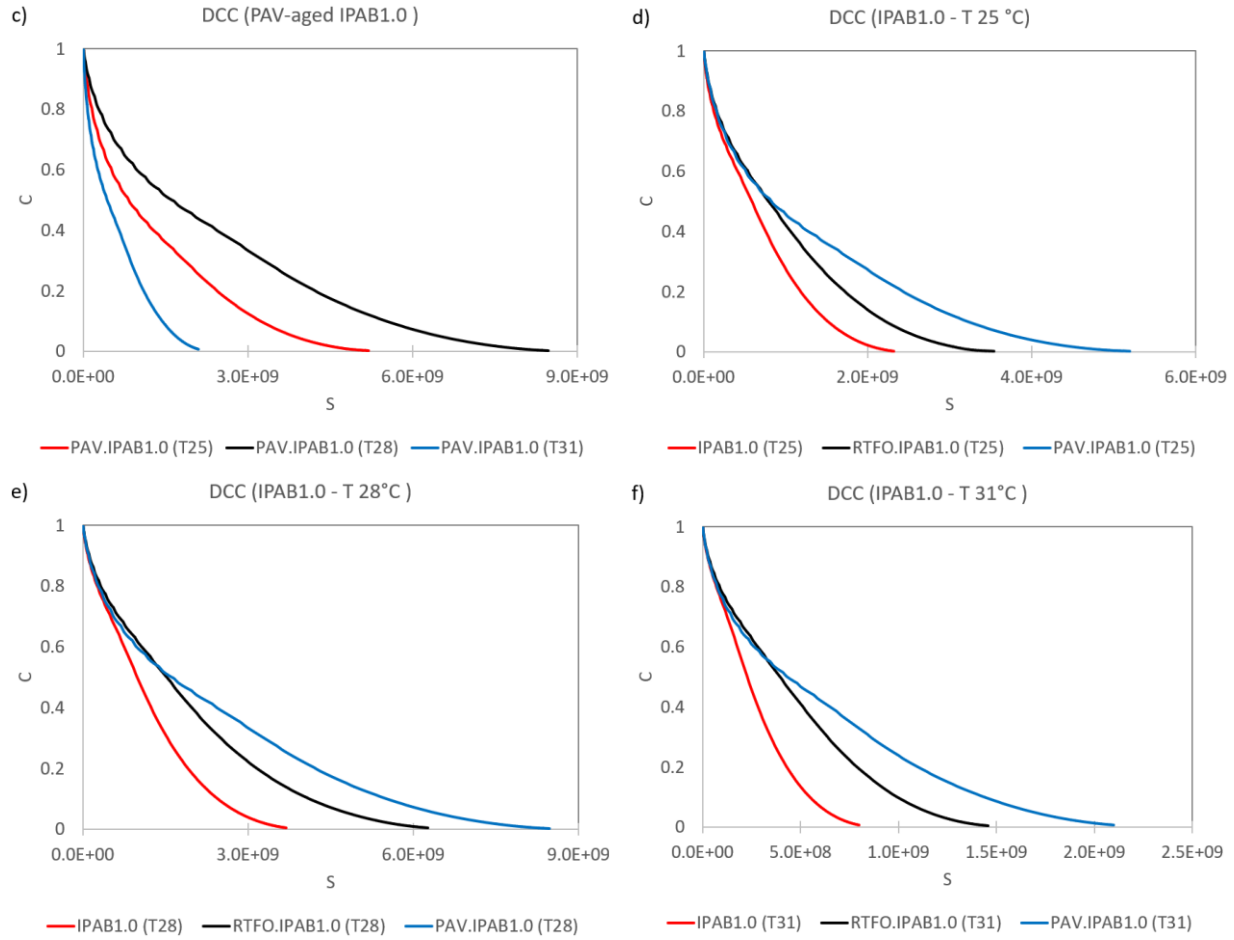

Figure. S 7 DCCs of IPAB1.0 at different temperatures and aging conditions: a) unaged IPAB1.0 – T25, T28, T31 b) RTFO-aged IPAB1.0 – T25, T28, T31 c) PAV-aged IPAB1.0 – T25, T28, T31 d) T25 – unaged IPAB1.0, RTFO-aged IPAB1.0, PAV-aged IPAB1.0 e) T28 – unaged IPAB1.0, RTFO-aged IPAB1.0, PAV-aged IPAB1.0 f) T31 – unaged IPAB1.0, RTFO-aged IPAB1.0, PAV-aged IPAB1.0.

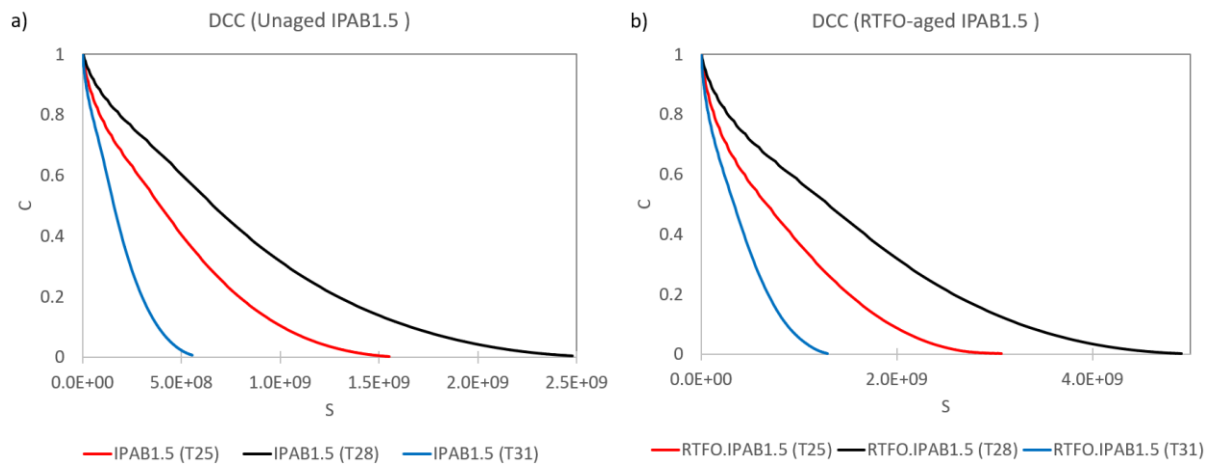



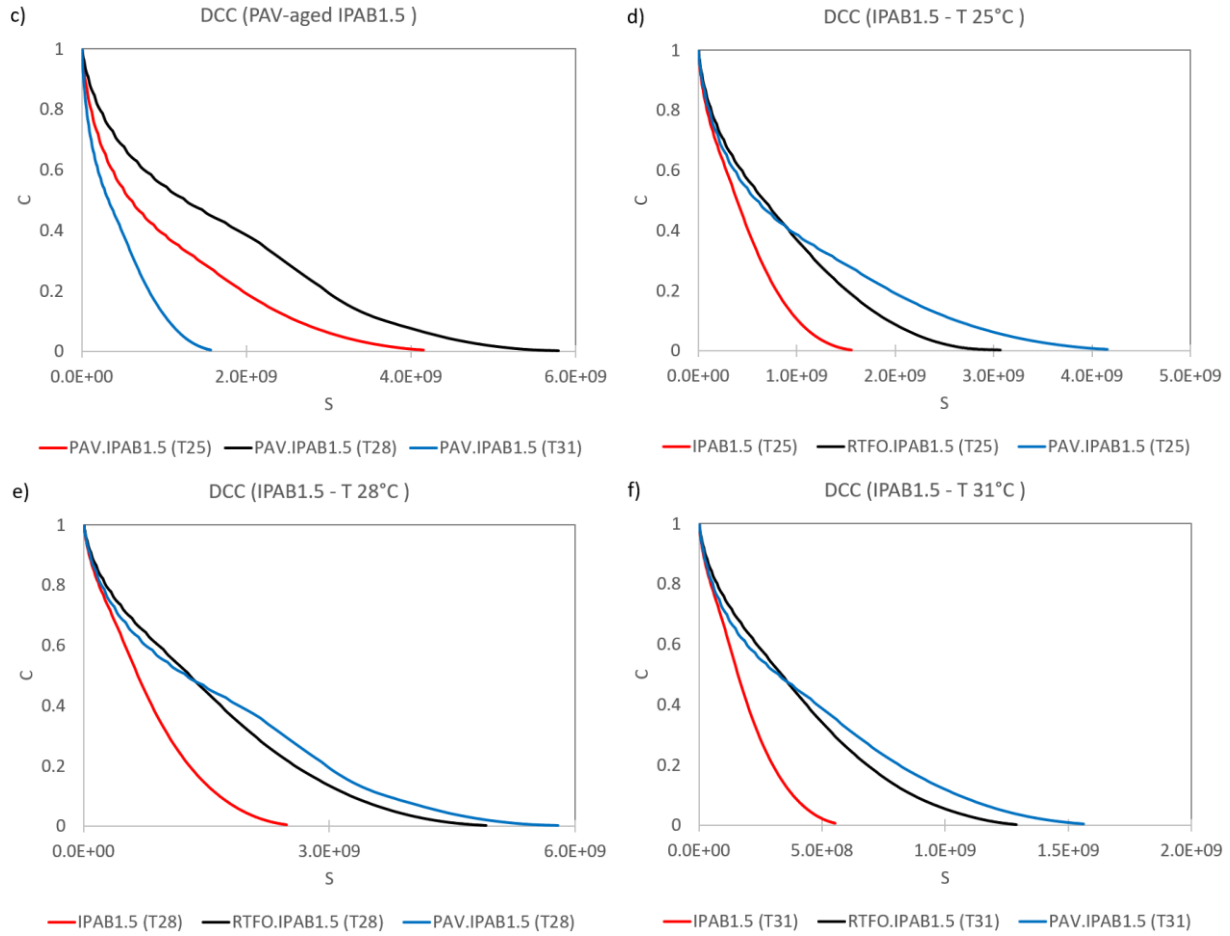

Figure. S 8 DCCs of IPAB1.5 at different temperatures and aging conditions: a) unaged IPAB1.5 – T25, T28, T31 b) RTFO-aged IPAB1.5 – T25, T28, T31 c) PAV-aged IPAB1.5 – T25, T28, T31 d) T25 – unaged IPAB1.5, RTFO-aged IPAB1.5, PAV-aged IPAB1.5 e) T28 – unaged IPAB1.5, RTFO-aged IPAB1.5, PAV-aged IPAB1.5 f) T31 – unaged IPAB1.5, RTFO-aged IPAB1.5, PAV-aged IPAB1.5.

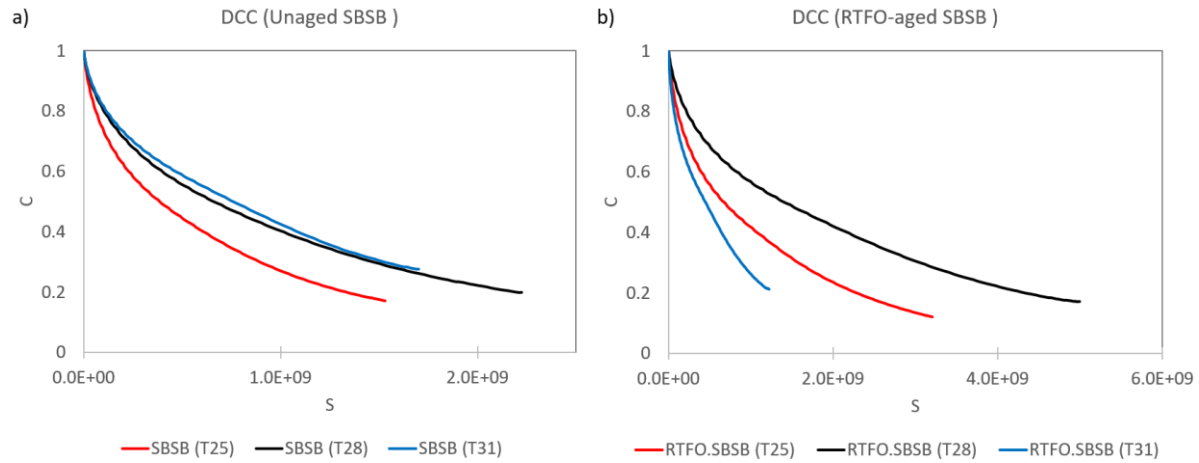

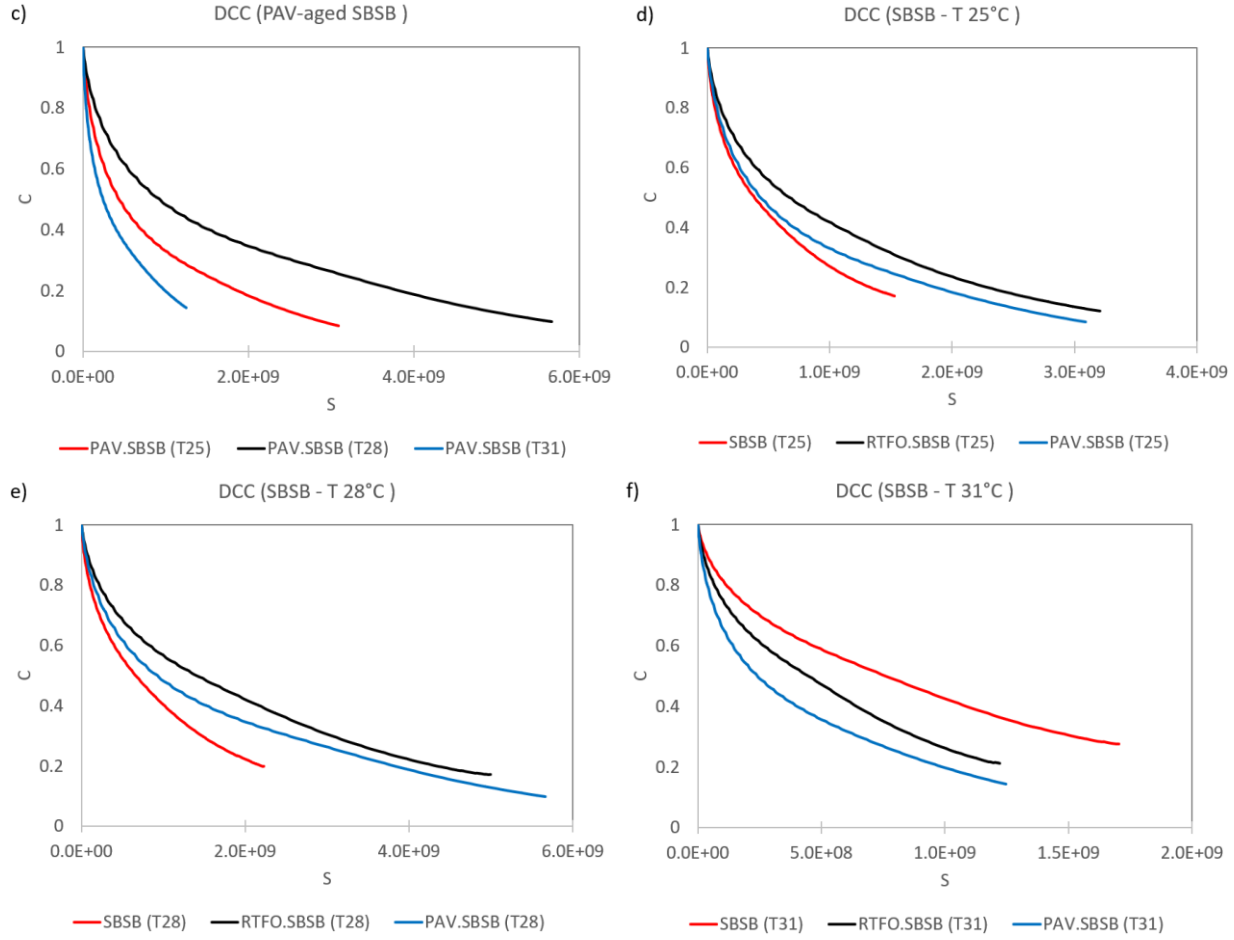

Figure. S 9 DCCs of SBSB at different temperatures and aging conditions: a) unaged SBSB – T25, T28, T31 b) RTFO-aged SBSB – T25, T28, T31 c) PAV-aged SBSB – T25, T28, T31 d) T25 – unaged SBSB, RTFO-aged SBSB, PAV-aged SBSB e) T28 – unaged SBSB, RTFO-aged SBSB, PAV-aged SBSB f) T31 – unaged SBSB, RTFO-aged SBSB, PAV-aged SBSB.

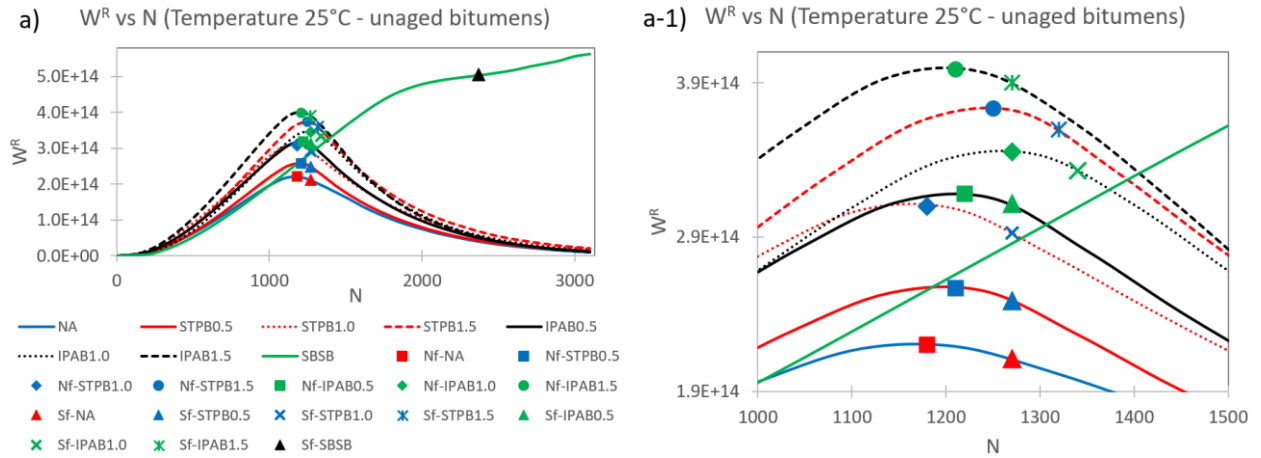

b)  $W^R$  vs N (Temperature 25°C - RTFO aged bitumens)

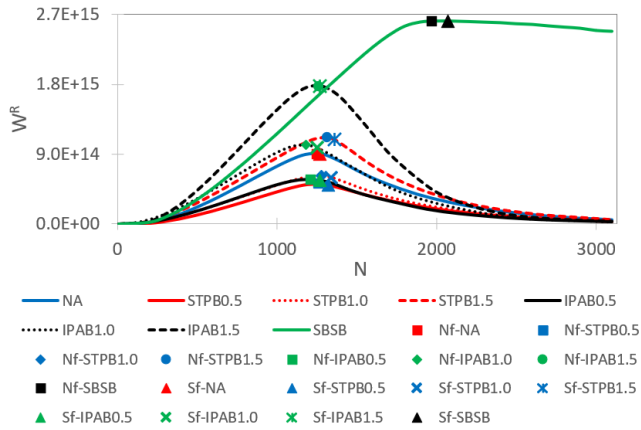

b-1)  $W^R$  vs N (Temperature 25°C - RTFO aged bitumens)

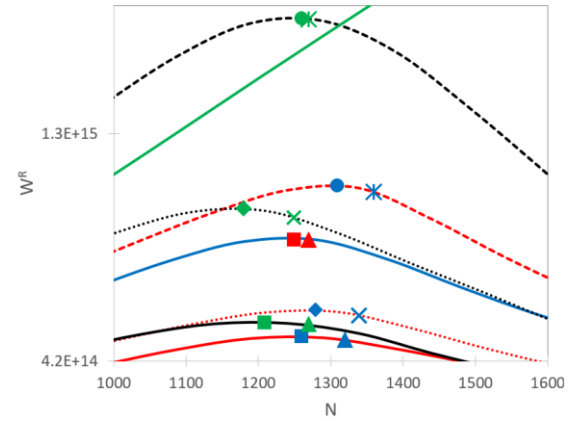

c)  $W^R$  vs N (Temperature 25°C - PAV aged bitumens)

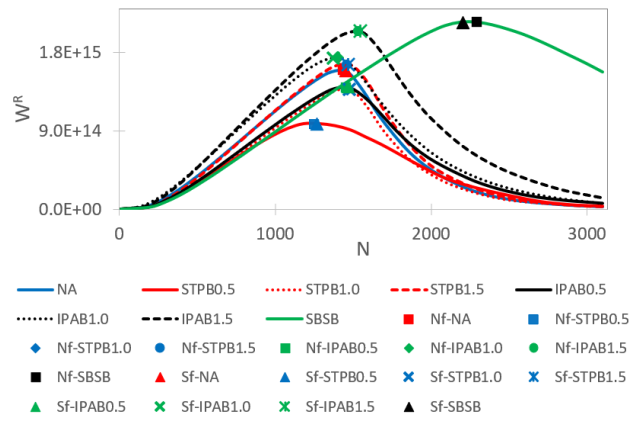

c-1)  $W^R$  vs N (Temperature 25°C - PAV aged bitumens)

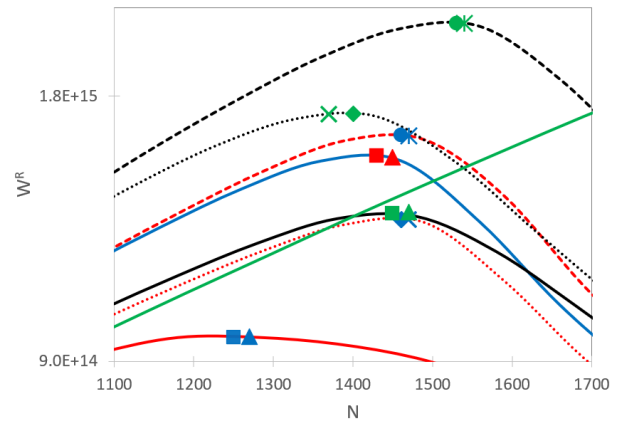

d)  $W^R$  vs N (Temperature 28°C - unaged bitumens)

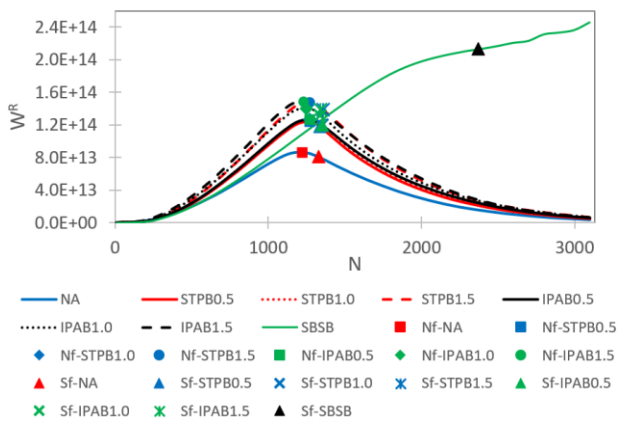

d-1)  $W^R$  vs N (Temperature 28°C - unaged bitumens)

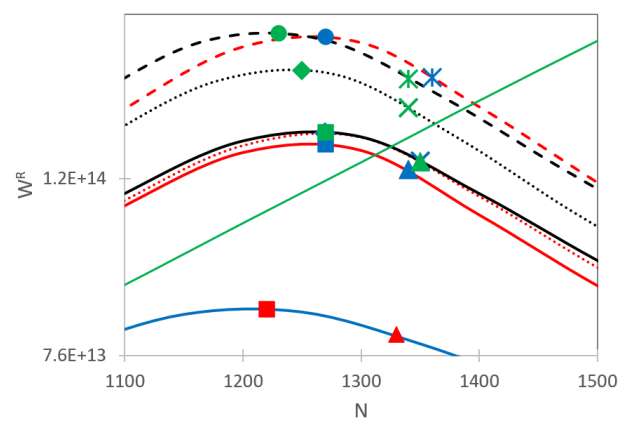

e)  $W^R$  vs N (Temperature 28°C - RTFO aged bitumens)

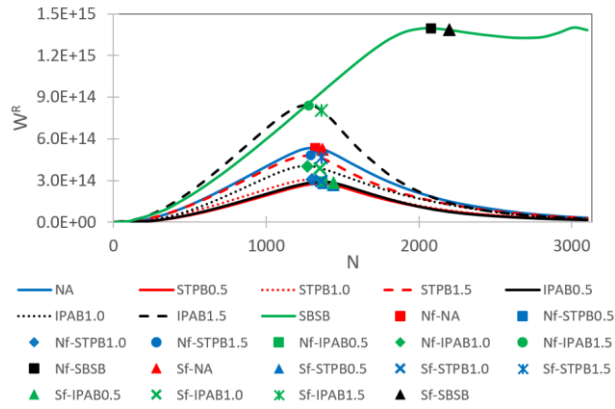

e-1)  $W^R$  vs N (Temperature 28°C - RTFO aged bitumens)

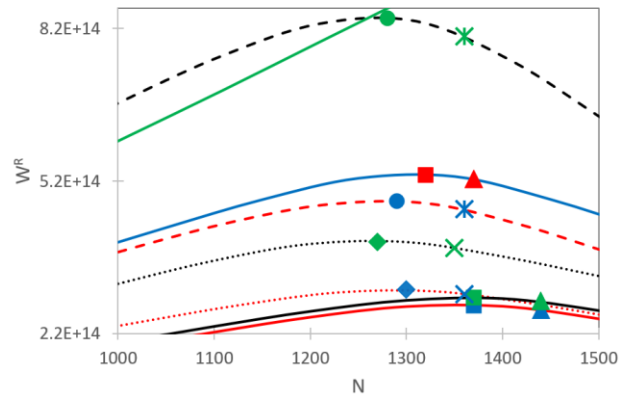

f)  $W^R$  vs N (Temperature 28°C - PAV aged bitumens)

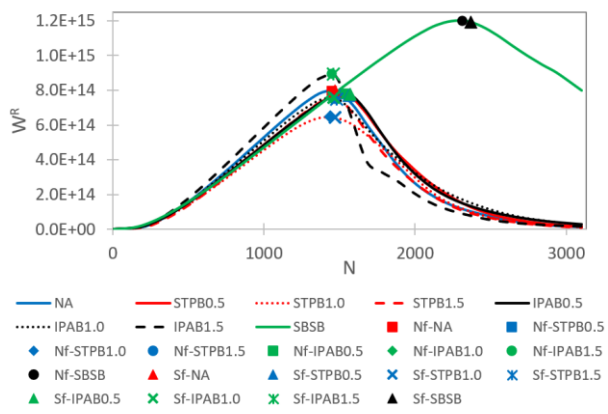

f-1)  $W^R$  vs N (Temperature 28°C - PAV aged bitumens)

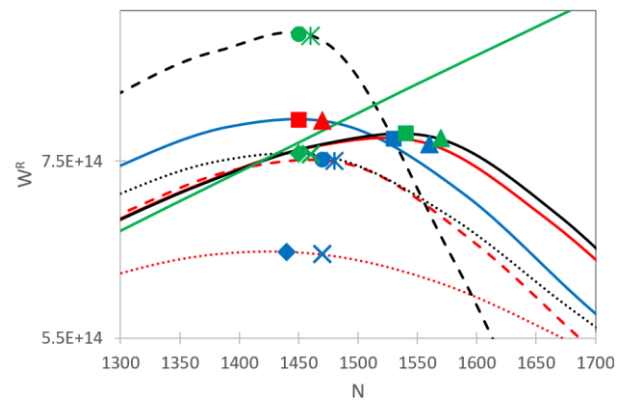

g)  $W^R$  vs N (Temperature 31°C - unaged bitumens)

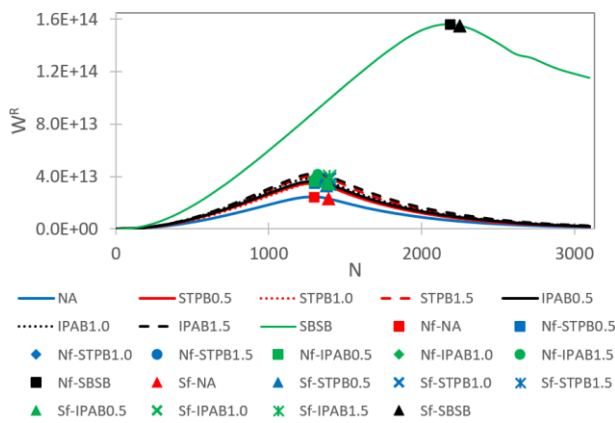

g-1)  $W^R$  vs N (Temperature 31°C - unaged bitumens)

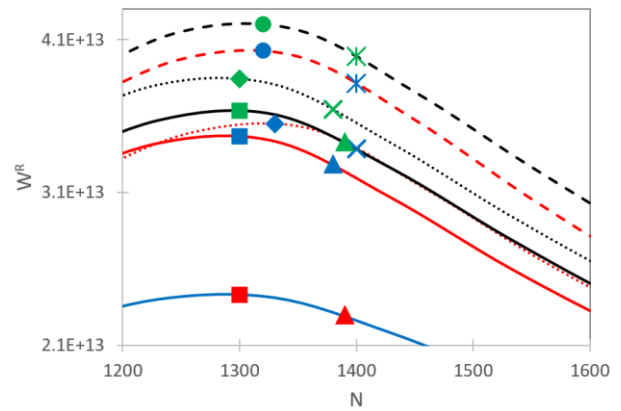

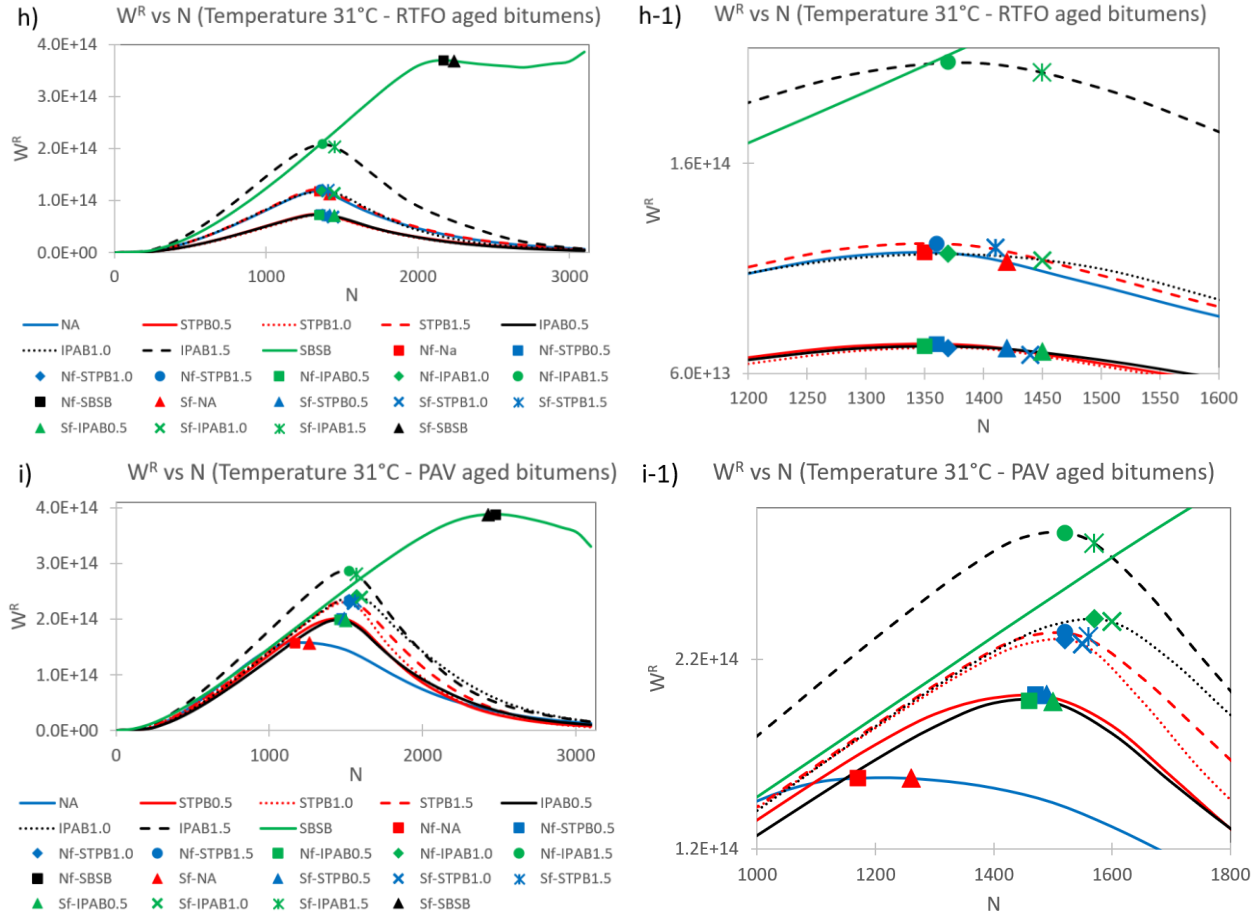

Figure. S 10 Failure definition points identified by the peak of  $W^R$  (Nf) and the peak of SPC (Sf) on  $W^R$  curve: a) T 25°C - unaged bitumens, a-1) zoom [peaks of PSE curves in a)], b) T 25°C – RTFO aged bitumens, b-1) zoom [peaks of PSE curves in b)], c) T 25°C – PAV aged bitumens, c-1) zoom [peaks of PSE curves in c)], d) T 28°C - unaged bitumens, d-1) zoom [peaks of PSE curves in d)], e) T 28°C – RTFO aged bitumens, e-1) zoom [peaks of PSE curves in e)], f) T 28°C – PAV aged bitumens, f-1) zoom [peaks of PSE curves in f)], g) T 31°C - unaged bitumens, g-1) zoom [peaks of PSE curves in g)], h) T 31°C – RTFO aged bitumens, h-1) zoom [peaks of PSE curves in h)], i) T 31°C – PAV aged bitumens, i-1) zoom [peaks of PSE curves in i)].

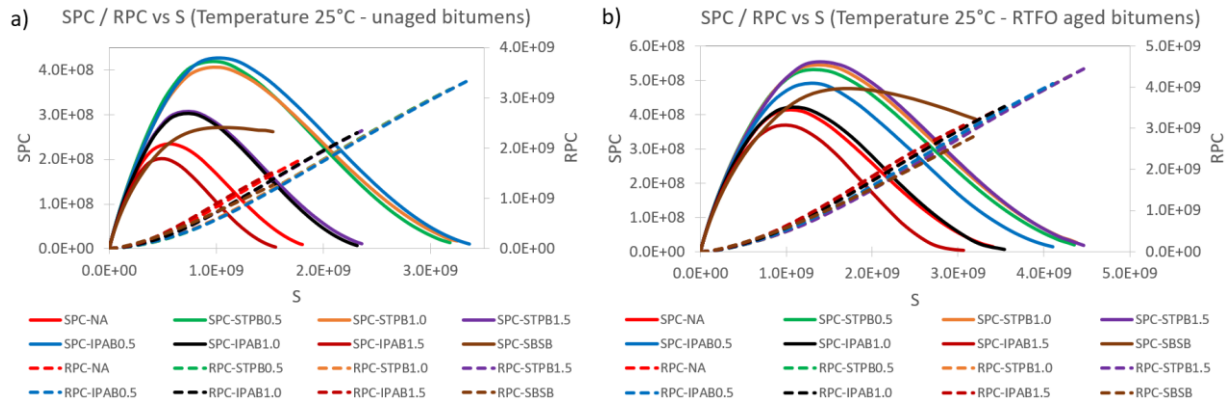

c) SPC / RPC vs S (Temperature 25°C - PAV aged bitumens)

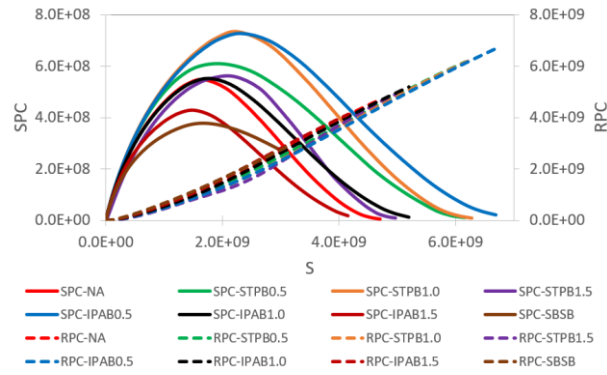

d) SPC / RPC vs S (Temperature 28°C - unaged bitumens)

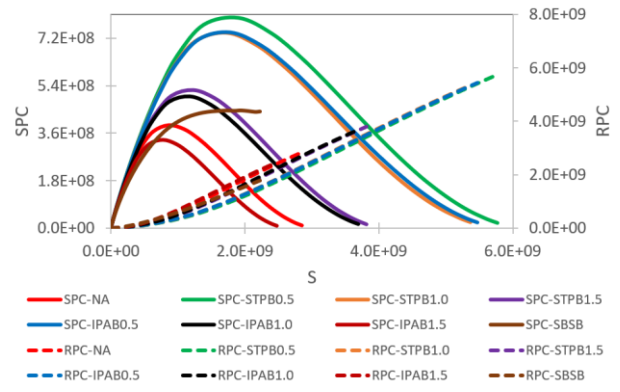

e) SPC / RPC vs S (Temperature 28°C - RTFO aged bitumens)

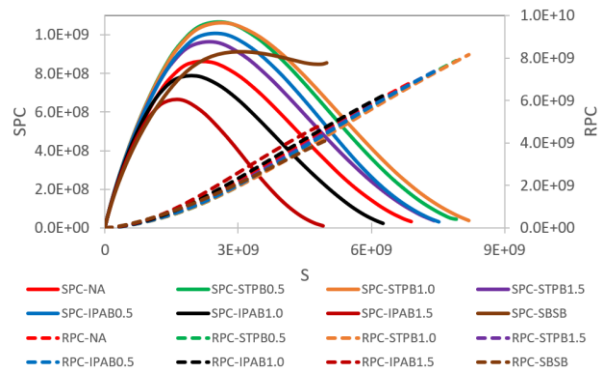

f) SPC / RPC vs S (Temperature 28°C - PAV aged bitumens)

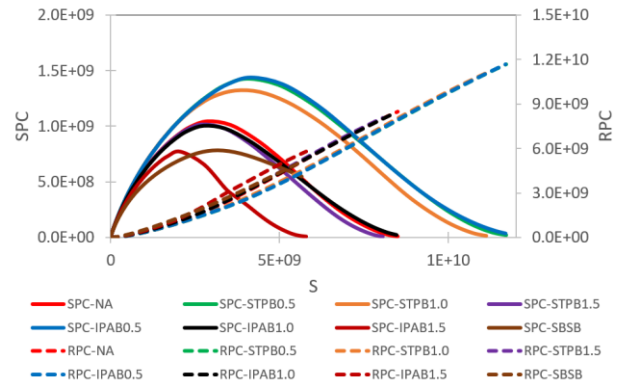

g) SPC / RPC vs S (Temperature 31°C - unaged bitumens)

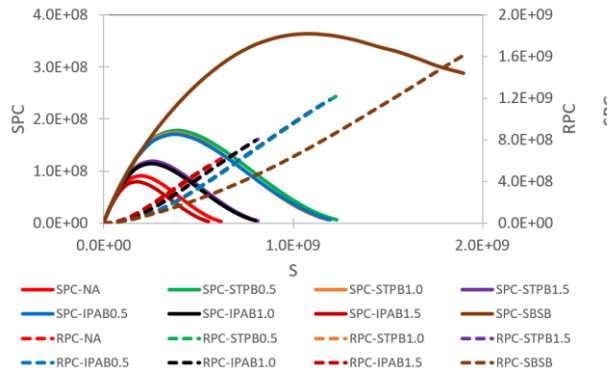

h) SPC / RPC vs S (Temperature 31°C - RTFO aged bitumens)

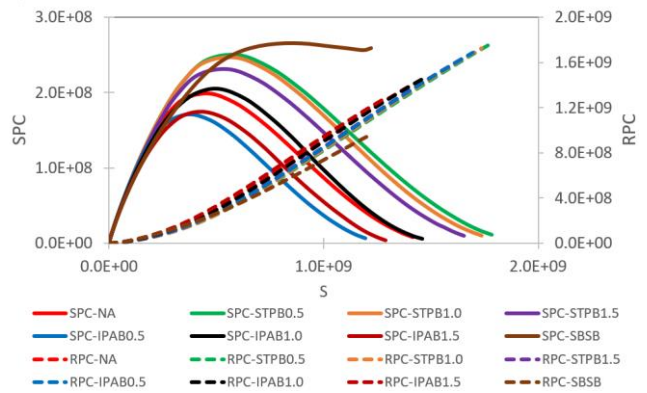

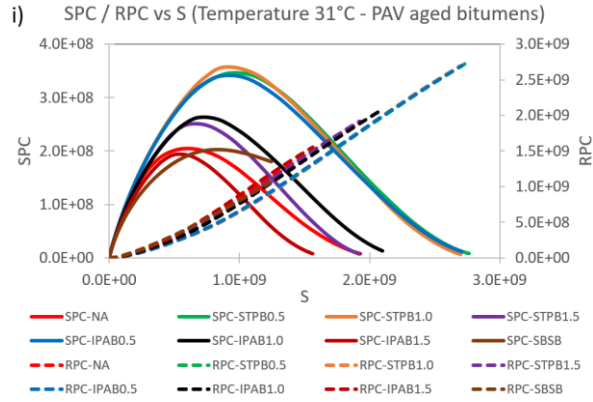

Figure. S 11 SPC and RPC curves of bitumens: a) T 25°C - unaged bitumens, b) T 25°C – RTFO aged bitumens, c) T 25°C – PAV aged bitumens, d) T 28°C - unaged bitumens, e) T 28°C – RTFO aged bitumens, f) T 28°C – PAV aged bitumens, g) T 31°C - unaged bitumens, h) T 31°C – RTFO aged bitumens, i) T 31°C – PAV aged bitumens.

Table S 1  $CW_{DCC}$  of unaged bitumens at each failure point (25 °C).

|                          |         | $CW_{DCC}$ (T25 – unaged bitumen) |           |           |           |           |           |           |           |
|--------------------------|---------|-----------------------------------|-----------|-----------|-----------|-----------|-----------|-----------|-----------|
|                          |         | NA                                | STPB0.5   | STPB1.0   | STPB1.5   | IPAB0.5   | IPAB1.0   | IPAB1.5   | SBSB      |
| At the failure point of: | NA      | 3.529E+08                         | 4.102E+08 | 4.039E+08 | 3.766E+08 | 4.035E+08 | 3.674E+08 | 3.250E+08 | 3.243E+08 |
|                          | STPB0.5 | 4.772E+08                         | 6.210E+08 | 6.060E+08 | 5.392E+08 | 6.096E+08 | 5.282E+08 | 4.257E+08 | 4.598E+08 |
|                          | STPB1.0 | 4.940E+08                         | 6.628E+08 | 6.453E+08 | 5.673E+08 | 6.504E+08 | 5.567E+08 | 4.371E+08 | 4.837E+08 |
|                          | STPB1.5 | 4.321E+08                         | 5.328E+08 | 5.221E+08 | 4.749E+08 | 5.234E+08 | 4.640E+08 | 3.911E+08 | 4.059E+08 |
|                          | IPAB0.5 | 4.925E+08                         | 6.587E+08 | 6.415E+08 | 5.646E+08 | 6.464E+08 | 5.540E+08 | 4.362E+08 | 4.814E+08 |
|                          | IPAB1.0 | 4.336E+08                         | 5.355E+08 | 5.247E+08 | 4.770E+08 | 5.261E+08 | 4.660E+08 | 3.924E+08 | 4.076E+08 |
|                          | IPAB1.5 | 3.196E+08                         | 3.645E+08 | 3.595E+08 | 3.380E+08 | 3.589E+08 | 3.297E+08 | 2.961E+08 | 2.923E+08 |
|                          | SBSB    | 5.003E+08                         | 6.814E+08 | 6.627E+08 | 5.792E+08 | 6.686E+08 | 5.689E+08 | 4.410E+08 | 4.939E+08 |

Table S 2  $CW_{SPC}$  of unaged bitumens at each failure point (25 °C).

|                          |         | $CW_{SPC}$ (T25 – unaged bitumen) |           |           |           |           |           |           |           |
|--------------------------|---------|-----------------------------------|-----------|-----------|-----------|-----------|-----------|-----------|-----------|
|                          |         | NA                                | STPB0.5   | STPB1.0   | STPB1.5   | IPAB0.5   | IPAB1.0   | IPAB1.5   | SBSB      |
| At the failure point of: | NA      | 8.119E+16                         | 1.032E+17 | 9.834E+16 | 9.153E+16 | 9.798E+16 | 8.936E+16 | 7.314E+16 | 7.293E+16 |
|                          | STPB0.5 | 1.659E+17                         | 2.533E+17 | 2.422E+17 | 2.069E+17 | 2.477E+17 | 2.015E+17 | 1.398E+17 | 1.643E+17 |
|                          | STPB1.0 | 1.820E+17                         | 2.912E+17 | 2.792E+17 | 2.326E+17 | 2.862E+17 | 2.266E+17 | 1.507E+17 | 1.812E+17 |
|                          | STPB1.5 | 1.298E+17                         | 1.819E+17 | 1.735E+17 | 1.545E+17 | 1.768E+17 | 1.506E+17 | 1.130E+17 | 1.293E+17 |
|                          | IPAB0.5 | 1.805E+17                         | 2.874E+17 | 2.755E+17 | 2.301E+17 | 2.823E+17 | 2.242E+17 | 1.497E+17 | 1.785E+17 |
|                          | IPAB1.0 | 1.309E+17                         | 1.839E+17 | 1.754E+17 | 1.561E+17 | 1.788E+17 | 1.521E+17 | 1.139E+17 | 1.306E+17 |
|                          | IPAB1.5 | 6.495E+16                         | 8.005E+16 | 7.628E+16 | 7.194E+16 | 7.611E+16 | 7.029E+16 | 5.912E+16 | 5.901E+16 |
|                          | SBSB    | 1.887E+17                         | 3.089E+17 | 2.966E+17 | 2.440E+17 | 3.043E+17 | 2.378E+17 | 1.549E+17 | 1.862E+17 |

Table S 3 Ranking of  $CW_{DCC}$  of unaged bitumens respect to each failure point (25 °C)

| Ranking of $CW_{DCC}$ (T25 – unaged bitumen) |         |         |         |         |         |         |      |
|----------------------------------------------|---------|---------|---------|---------|---------|---------|------|
| NA                                           | STPB0.5 | STPB1.0 | STPB1.5 | IPAB0.5 | IPAB1.0 | IPAB1.5 | SBSB |



|  |         |   |   |   |   |   |   |   |   |
|--|---------|---|---|---|---|---|---|---|---|
|  | NA      | 6 | 1 | 2 | 4 | 3 | 5 | 7 | 8 |
|  | STPB0.5 | 6 | 1 | 3 | 4 | 2 | 5 | 8 | 7 |
|  | STPB1.0 | 6 | 1 | 3 | 4 | 2 | 5 | 8 | 7 |
|  | STPB1.5 | 6 | 1 | 3 | 4 | 2 | 5 | 8 | 7 |
|  | IPAB0.5 | 6 | 1 | 3 | 4 | 2 | 5 | 8 | 7 |
|  | IPAB1.0 | 6 | 1 | 3 | 4 | 2 | 5 | 8 | 7 |
|  | IPAB1.5 | 6 | 1 | 2 | 4 | 3 | 5 | 7 | 8 |
|  | SBSB    | 6 | 1 | 3 | 4 | 2 | 5 | 8 | 7 |

Table S 4 Ranking of  $CW_{SPC}$  of unaged bitumens respect to each failure point (25 °C).

|  |         | Ranking of $CW_{SPC}$ (T25 – unaged bitumen) |         |         |         |         |         |         |      |
|--|---------|----------------------------------------------|---------|---------|---------|---------|---------|---------|------|
|  |         | NA                                           | STPB0.5 | STPB1.0 | STPB1.5 | IPAB0.5 | IPAB1.0 | IPAB1.5 | SBSB |
|  | NA      | 6                                            | 1       | 2       | 4       | 3       | 5       | 7       | 8    |
|  | STPB0.5 | 6                                            | 1       | 3       | 4       | 2       | 5       | 8       | 7    |
|  | STPB1.0 | 6                                            | 1       | 3       | 4       | 2       | 5       | 8       | 7    |
|  | STPB1.5 | 6                                            | 1       | 3       | 4       | 2       | 5       | 8       | 7    |
|  | IPAB0.5 | 6                                            | 1       | 3       | 4       | 2       | 5       | 8       | 7    |
|  | IPAB1.0 | 6                                            | 1       | 3       | 4       | 2       | 5       | 8       | 7    |
|  | IPAB1.5 | 6                                            | 1       | 2       | 4       | 3       | 5       | 7       | 8    |
|  | SBSB    | 6                                            | 1       | 3       | 4       | 2       | 5       | 8       | 7    |

Table S 5  $CW_{DCC}$  of RTFO aged bitumens at each failure point (25 °C).

|  |         | $CW_{DCC}$ (T25 – RTFO aged bitumen) |           |           |           |           |           |           |           |
|--|---------|--------------------------------------|-----------|-----------|-----------|-----------|-----------|-----------|-----------|
|  |         | NA                                   | STPB0.5   | STPB1.0   | STPB1.5   | IPAB0.5   | IPAB1.0   | IPAB1.5   | SBSB      |
|  | NA      | 6.514E+08                            | 7.182E+08 | 7.247E+08 | 7.089E+08 | 6.896E+08 | 6.595E+08 | 6.171E+08 | 6.225E+08 |
|  | STPB0.5 | 7.550E+08                            | 8.494E+08 | 8.594E+08 | 8.451E+08 | 8.135E+08 | 7.669E+08 | 7.073E+08 | 7.339E+08 |
|  | STPB1.0 | 7.663E+08                            | 8.643E+08 | 8.748E+08 | 8.610E+08 | 8.276E+08 | 7.786E+08 | 7.168E+08 | 7.467E+08 |
|  | STPB1.5 | 7.723E+08                            | 8.724E+08 | 8.832E+08 | 8.697E+08 | 8.352E+08 | 7.850E+08 | 7.218E+08 | 7.536E+08 |
|  | IPAB0.5 | 7.347E+08                            | 8.227E+08 | 8.319E+08 | 8.170E+08 | 7.883E+08 | 7.456E+08 | 6.900E+08 | 7.111E+08 |
|  | IPAB1.0 | 6.758E+08                            | 7.482E+08 | 7.554E+08 | 7.396E+08 | 7.180E+08 | 6.846E+08 | 6.387E+08 | 6.478E+08 |
|  | IPAB1.5 | 5.886E+08                            | 6.426E+08 | 6.476E+08 | 6.323E+08 | 6.181E+08 | 5.949E+08 | 5.606E+08 | 5.588E+08 |
|  | SBSB    | 8.284E+08                            | 9.517E+08 | 9.657E+08 | 9.563E+08 | 9.099E+08 | 8.444E+08 | 7.668E+08 | 8.225E+08 |

Table S 6  $CW_{SPC}$  of RTFO aged bitumens at each failure point (25 °C).

|  |         | $CW_{SPC}$ (T25 – RTFO aged bitumen) |           |           |           |           |           |           |           |
|--|---------|--------------------------------------|-----------|-----------|-----------|-----------|-----------|-----------|-----------|
|  |         | NA                                   | STPB0.5   | STPB1.0   | STPB1.5   | IPAB0.5   | IPAB1.0   | IPAB1.5   | SBSB      |
|  | NA      | 2.989E+17                            | 3.310E+17 | 3.371E+17 | 3.304E+17 | 3.278E+17 | 3.004E+17 | 2.745E+17 | 2.846E+17 |
|  | STPB0.5 | 4.238E+17                            | 4.892E+17 | 5.012E+17 | 4.878E+17 | 4.775E+17 | 4.284E+17 | 3.844E+17 | 4.229E+17 |
|  | STPB1.0 | 4.395E+17                            | 5.100E+17 | 5.230E+17 | 5.091E+17 | 4.969E+17 | 4.444E+17 | 3.977E+17 | 4.373E+17 |



|           |         |           |           |           |           |           |           |           |           |
|-----------|---------|-----------|-----------|-----------|-----------|-----------|-----------|-----------|-----------|
| point of: | STPB1.5 | 4.481E+17 | 5.216E+17 | 5.351E+17 | 5.196E+17 | 5.077E+17 | 4.532E+17 | 4.050E+17 | 4.461E+17 |
|           | IPAB0.5 | 3.963E+17 | 4.536E+17 | 4.640E+17 | 4.501E+17 | 4.441E+17 | 4.005E+17 | 3.610E+17 | 3.913E+17 |
|           | IPAB1.0 | 3.245E+17 | 3.636E+17 | 3.707E+17 | 3.618E+17 | 3.589E+17 | 3.277E+17 | 2.983E+17 | 3.127E+17 |
|           | IPAB1.5 | 2.351E+17 | 2.571E+17 | 2.613E+17 | 2.569E+17 | 2.567E+17 | 2.372E+17 | 2.183E+17 | 2.162E+17 |
|           | SBSB    | 5.713E+17 | 6.454E+17 | 6.664E+17 | 6.657E+17 | 6.225E+17 | 5.759E+17 | 4.764E+17 | 5.676E+17 |

Table S 7 Ranking of  $CW_{DCC}$  of RTFO aged bitumens respect to each failure point (25 °C).

|                          |         | Ranking of $CW_{DCC}$ (T25 – RTFO aged bitumen) |         |         |         |         |         |         |      |
|--------------------------|---------|-------------------------------------------------|---------|---------|---------|---------|---------|---------|------|
|                          |         | NA                                              | STPB0.5 | STPB1.0 | STPB1.5 | IPAB0.5 | IPAB1.0 | IPAB1.5 | SBSB |
| At the failure point of: | NA      | 6                                               | 2       | 1       | 3       | 4       | 5       | 8       | 7    |
|                          | STPB0.5 | 6                                               | 2       | 1       | 3       | 4       | 5       | 8       | 7    |
|                          | STPB1.0 | 6                                               | 2       | 1       | 3       | 4       | 5       | 8       | 7    |
|                          | STPB1.5 | 6                                               | 2       | 1       | 3       | 4       | 5       | 8       | 7    |
|                          | IPAB0.5 | 6                                               | 2       | 1       | 3       | 4       | 5       | 8       | 7    |
|                          | IPAB1.0 | 6                                               | 2       | 1       | 3       | 4       | 5       | 8       | 7    |
|                          | IPAB1.5 | 6                                               | 2       | 1       | 3       | 4       | 5       | 7       | 8    |
|                          | SBSB    | 6                                               | 3       | 1       | 2       | 4       | 5       | 8       | 7    |

Table S 8 Ranking of  $CW_{SPC}$  of RTFO aged bitumens respect to each failure point (25 °C).

|                          |         | Ranking of $CW_{SPC}$ (T25 – RTFO aged bitumen) |         |         |         |         |         |         |      |
|--------------------------|---------|-------------------------------------------------|---------|---------|---------|---------|---------|---------|------|
|                          |         | NA                                              | STPB0.5 | STPB1.0 | STPB1.5 | IPAB0.5 | IPAB1.0 | IPAB1.5 | SBSB |
| At the failure point of: | NA      | 6                                               | 2       | 1       | 3       | 4       | 5       | 8       | 7    |
|                          | STPB0.5 | 6                                               | 2       | 1       | 3       | 4       | 5       | 8       | 7    |
|                          | STPB1.0 | 6                                               | 2       | 1       | 3       | 4       | 5       | 8       | 7    |
|                          | STPB1.5 | 6                                               | 2       | 1       | 3       | 4       | 5       | 8       | 7    |
|                          | IPAB0.5 | 6                                               | 2       | 1       | 3       | 4       | 5       | 8       | 7    |
|                          | IPAB1.0 | 6                                               | 2       | 1       | 3       | 4       | 5       | 8       | 7    |
|                          | IPAB1.5 | 6                                               | 2       | 1       | 3       | 4       | 5       | 7       | 8    |
|                          | SBSB    | 6                                               | 3       | 1       | 2       | 4       | 5       | 8       | 7    |

Table S 9  $CW_{DCC}$  of PAV aged bitumens at each failure point (25 °C).

|                          |         | $CW_{DCC}$ (T25 – PAV aged bitumen) |           |           |           |           |           |           |           |
|--------------------------|---------|-------------------------------------|-----------|-----------|-----------|-----------|-----------|-----------|-----------|
|                          |         | NA                                  | STPB0.5   | STPB1.0   | STPB1.5   | IPAB0.5   | IPAB1.0   | IPAB1.5   | SBSB      |
| At the failure point of: | NA      | 9.211E+08                           | 9.865E+08 | 1.021E+09 | 9.277E+08 | 1.015E+09 | 9.232E+08 | 8.078E+08 | 7.303E+08 |
|                          | STPB0.5 | 9.756E+08                           | 1.050E+09 | 1.092E+09 | 9.826E+08 | 1.085E+09 | 9.789E+08 | 8.481E+08 | 7.662E+08 |
|                          | STPB1.0 | 1.064E+09                           | 1.155E+09 | 1.215E+09 | 1.071E+09 | 1.208E+09 | 1.070E+09 | 9.082E+08 | 8.199E+08 |
|                          | STPB1.5 | 9.480E+08                           | 1.018E+09 | 1.056E+09 | 9.548E+08 | 1.049E+09 | 9.507E+08 | 8.279E+08 | 7.482E+08 |
|                          | IPAB0.5 | 1.080E+09                           | 1.176E+09 | 1.240E+09 | 1.088E+09 | 1.233E+09 | 1.088E+09 | 9.184E+08 | 8.292E+08 |
|                          | IPAB1.0 | 9.501E+08                           | 1.020E+09 | 1.059E+09 | 9.570E+08 | 1.052E+09 | 9.528E+08 | 8.295E+08 | 7.496E+08 |

|         |           |           |           |           |           |           |           |           |
|---------|-----------|-----------|-----------|-----------|-----------|-----------|-----------|-----------|
| IPAB1.5 | 8.602E+08 | 9.173E+08 | 9.452E+08 | 8.663E+08 | 9.390E+08 | 8.612E+08 | 7.607E+08 | 6.886E+08 |
| SBSB    | 9.327E+08 | 9.999E+08 | 1.036E+09 | 9.394E+08 | 1.030E+09 | 9.351E+08 | 8.165E+08 | 7.381E+08 |

Table S 10  $CW_{SPC}$  of PAV aged bitumens at each failure point (25 °C).

|                          |         | $CW_{SPC}$ (T25 – PAV aged bitumen) |           |           |           |           |           |           |           |
|--------------------------|---------|-------------------------------------|-----------|-----------|-----------|-----------|-----------|-----------|-----------|
|                          |         | NA                                  | STPB0.5   | STPB1.0   | STPB1.5   | IPAB0.5   | IPAB1.0   | IPAB1.5   | SBSB      |
| At the failure point of: | NA      | 6.551E+17                           | 7.071E+17 | 7.292E+17 | 6.597E+17 | 7.276E+17 | 6.574E+17 | 5.378E+17 | 4.739E+17 |
|                          | STPB0.5 | 7.597E+17                           | 8.265E+17 | 8.604E+17 | 7.641E+17 | 8.587E+17 | 7.625E+17 | 6.148E+17 | 5.447E+17 |
|                          | STPB1.0 | 9.620E+17                           | 1.063E+18 | 1.139E+18 | 9.699E+17 | 1.138E+18 | 9.680E+17 | 7.554E+17 | 6.839E+17 |
|                          | STPB1.5 | 6.989E+17                           | 7.641E+17 | 7.911E+17 | 7.097E+17 | 7.895E+17 | 7.077E+17 | 5.750E+17 | 5.078E+17 |
|                          | IPAB0.5 | 9.992E+17                           | 1.116E+18 | 1.208E+18 | 1.015E+18 | 1.206E+18 | 1.014E+18 | 7.849E+17 | 7.160E+17 |
|                          | IPAB1.0 | 7.079E+17                           | 7.686E+17 | 7.962E+17 | 7.137E+17 | 7.945E+17 | 7.117E+17 | 5.780E+17 | 5.105E+17 |
|                          | IPAB1.5 | 5.513E+17                           | 5.910E+17 | 6.058E+17 | 5.571E+17 | 6.043E+17 | 5.542E+17 | 4.595E+17 | 4.038E+17 |
|                          | SBSB    | 6.758E+17                           | 7.313E+17 | 7.553E+17 | 6.810E+17 | 7.537E+17 | 6.788E+17 | 5.537E+17 | 4.883E+17 |

Table S 11 Ranking of  $CW_{DCC}$  of PAV aged bitumens respect to each failure point (25 °C).

|                          |         | Ranking of $CW_{DCC}$ (T25 – PAV aged bitumen) |         |         |         |         |         |         |      |
|--------------------------|---------|------------------------------------------------|---------|---------|---------|---------|---------|---------|------|
|                          |         | NA                                             | STPB0.5 | STPB1.0 | STPB1.5 | IPAB0.5 | IPAB1.0 | IPAB1.5 | SBSB |
| At the failure point of: | NA      | 6                                              | 3       | 1       | 4       | 2       | 5       | 7       | 8    |
|                          | STPB0.5 | 6                                              | 3       | 1       | 4       | 2       | 5       | 7       | 8    |
|                          | STPB1.0 | 6                                              | 3       | 1       | 4       | 2       | 5       | 7       | 8    |
|                          | STPB1.5 | 6                                              | 3       | 1       | 4       | 2       | 5       | 7       | 8    |
|                          | IPAB0.5 | 6                                              | 3       | 1       | 4       | 2       | 5       | 7       | 8    |
|                          | IPAB1.0 | 6                                              | 3       | 1       | 4       | 2       | 5       | 7       | 8    |
|                          | IPAB1.5 | 6                                              | 3       | 1       | 4       | 2       | 5       | 7       | 8    |
|                          | SBSB    | 6                                              | 3       | 1       | 4       | 2       | 5       | 7       | 8    |

Table S 12 Ranking of  $CW_{SPC}$  of PAV aged bitumens respect to each failure point (25 °C).

|                          |         | Ranking of $CW_{SPC}$ (T25 – PAV aged bitumen) |         |         |         |         |         |         |      |
|--------------------------|---------|------------------------------------------------|---------|---------|---------|---------|---------|---------|------|
|                          |         | NA                                             | STPB0.5 | STPB1.0 | STPB1.5 | IPAB0.5 | IPAB1.0 | IPAB1.5 | SBSB |
| At the failure point of: | NA      | 6                                              | 3       | 1       | 4       | 2       | 5       | 7       | 8    |
|                          | STPB0.5 | 6                                              | 3       | 1       | 4       | 2       | 5       | 7       | 8    |
|                          | STPB1.0 | 6                                              | 3       | 1       | 4       | 2       | 5       | 7       | 8    |
|                          | STPB1.5 | 6                                              | 3       | 1       | 4       | 2       | 5       | 7       | 8    |
|                          | IPAB0.5 | 6                                              | 3       | 1       | 4       | 2       | 5       | 7       | 8    |
|                          | IPAB1.0 | 6                                              | 3       | 1       | 4       | 2       | 5       | 7       | 8    |
|                          | IPAB1.5 | 6                                              | 3       | 1       | 4       | 2       | 5       | 7       | 8    |
|                          | SBSB    | 6                                              | 3       | 1       | 4       | 2       | 5       | 7       | 8    |

Table S 13 CW<sub>DCC</sub> of unaged bitumens at each failure point (28 °C).

|                          |         | CW <sub>DCC</sub> (T28 – unaged bitumen) |           |           |           |           |           |           |           |
|--------------------------|---------|------------------------------------------|-----------|-----------|-----------|-----------|-----------|-----------|-----------|
|                          |         | NA                                       | STPB0.5   | STPB1.0   | STPB1.5   | IPAB0.5   | IPAB1.0   | IPAB1.5   | SBSB      |
| At the failure point of: | NA      | 5.969E+08                                | 7.065E+08 | 6.929E+08 | 6.387E+08 | 6.927E+08 | 6.301E+08 | 5.577E+08 | 5.451E+08 |
|                          | STPB0.5 | 8.622E+08                                | 1.215E+09 | 1.179E+09 | 9.940E+08 | 1.178E+09 | 9.766E+08 | 7.458E+08 | 8.345E+08 |
|                          | STPB1.0 | 8.416E+08                                | 1.155E+09 | 1.123E+09 | 9.587E+08 | 1.121E+09 | 9.424E+08 | 7.374E+08 | 8.054E+08 |
|                          | STPB1.5 | 7.245E+08                                | 9.086E+08 | 8.872E+08 | 7.941E+08 | 8.871E+08 | 7.820E+08 | 6.608E+08 | 6.712E+08 |
|                          | IPAB0.5 | 8.516E+08                                | 1.182E+09 | 1.148E+09 | 9.753E+08 | 1.147E+09 | 9.585E+08 | 7.418E+08 | 8.190E+08 |
|                          | IPAB1.0 | 7.075E+08                                | 8.793E+08 | 8.591E+08 | 7.725E+08 | 8.590E+08 | 7.609E+08 | 6.478E+08 | 6.537E+08 |
|                          | IPAB1.5 | 5.460E+08                                | 6.344E+08 | 6.231E+08 | 5.799E+08 | 6.229E+08 | 5.724E+08 | 5.139E+08 | 4.971E+08 |
|                          | SBSB    | 8.124E+08                                | 1.083E+09 | 1.055E+09 | 9.138E+08 | 1.053E+09 | 8.987E+08 | 7.215E+08 | 7.686E+08 |

Table S 14 CW<sub>SPC</sub> of unaged bitumens at each failure point (28 °C).

|                          |         | CW <sub>SPC</sub> (T28 – unaged bitumen) |           |           |           |           |           |           |           |
|--------------------------|---------|------------------------------------------|-----------|-----------|-----------|-----------|-----------|-----------|-----------|
|                          |         | NA                                       | STPB0.5   | STPB1.0   | STPB1.5   | IPAB0.5   | IPAB1.0   | IPAB1.5   | SBSB      |
| At the failure point of: | NA      | 2.387E+17                                | 3.013E+17 | 3.012E+17 | 2.613E+17 | 3.000E+17 | 2.603E+17 | 2.131E+17 | 2.127E+17 |
|                          | STPB0.5 | 5.882E+17                                | 9.509E+17 | 9.235E+17 | 7.036E+17 | 9.234E+17 | 6.847E+17 | 4.280E+17 | 5.863E+17 |
|                          | STPB1.0 | 5.332E+17                                | 8.550E+17 | 8.343E+17 | 6.469E+17 | 8.336E+17 | 6.328E+17 | 4.092E+17 | 5.326E+17 |
|                          | STPB1.5 | 3.596E+17                                | 5.126E+17 | 5.103E+17 | 4.224E+17 | 5.087E+17 | 4.185E+17 | 3.081E+17 | 3.416E+17 |
|                          | IPAB0.5 | 5.582E+17                                | 8.988E+17 | 8.750E+17 | 6.731E+17 | 8.747E+17 | 6.569E+17 | 4.182E+17 | 5.570E+17 |
|                          | IPAB1.0 | 3.420E+17                                | 4.775E+17 | 4.765E+17 | 3.973E+17 | 4.749E+17 | 3.940E+17 | 2.942E+17 | 3.213E+17 |
|                          | IPAB1.5 | 1.977E+17                                | 2.410E+17 | 2.403E+17 | 2.116E+17 | 2.392E+17 | 2.110E+17 | 1.749E+17 | 1.732E+17 |
|                          | SBSB    | 4.730E+17                                | 7.464E+17 | 7.326E+17 | 5.796E+17 | 7.314E+17 | 5.697E+17 | 3.833E+17 | 4.726E+17 |

Table S 15 Ranking of  $CW_{PCC}$  of unaged bitumens respect to each failure point (28 °C).

|                          |         | Ranking of CW <sub>DCC</sub> (T28 – unaged bitumen) |         |         |         |         |         |         |      |
|--------------------------|---------|-----------------------------------------------------|---------|---------|---------|---------|---------|---------|------|
|                          |         | NA                                                  | STPB0.5 | STPB1.0 | STPB1.5 | IPAB0.5 | IPAB1.0 | IPAB1.5 | SBSB |
| At the failure point of: | NA      | 6                                                   | 1       | 2       | 4       | 3       | 5       | 7       | 8    |
|                          | STPB0.5 | 6                                                   | 1       | 2       | 4       | 3       | 5       | 8       | 7    |
|                          | STPB1.0 | 6                                                   | 1       | 2       | 4       | 3       | 5       | 8       | 7    |
|                          | STPB1.5 | 6                                                   | 1       | 2       | 4       | 3       | 5       | 8       | 7    |
|                          | IPAB0.5 | 6                                                   | 1       | 2       | 4       | 3       | 5       | 8       | 7    |
|                          | IPAB1.0 | 6                                                   | 1       | 2       | 4       | 3       | 5       | 8       | 7    |
|                          | IPAB1.5 | 6                                                   | 1       | 2       | 4       | 3       | 5       | 7       | 8    |
|                          | SBSB    | 6                                                   | 1       | 2       | 4       | 3       | 5       | 8       | 7    |

Table S 16 Ranking of  $CW_{SPC}$  of unaged bitumens respect to each failure point (28 °C).

Ranking of CW<sub>SPC</sub> (T28 – unaged bitumen)

|                          |         | NA | STPB0.5 | STPB1.0 | STPB1.5 | IPAB0.5 | IPAB1.0 | IPAB1.5 | SBSB |
|--------------------------|---------|----|---------|---------|---------|---------|---------|---------|------|
| At the failure point of: | NA      | 6  | 1       | 2       | 4       | 3       | 5       | 7       | 8    |
|                          | STPB0.5 | 6  | 1       | 2       | 4       | 3       | 5       | 8       | 7    |
|                          | STPB1.0 | 6  | 1       | 2       | 4       | 3       | 5       | 8       | 7    |
|                          | STPB1.5 | 6  | 1       | 2       | 4       | 3       | 5       | 8       | 7    |
|                          | IPAB0.5 | 6  | 1       | 2       | 4       | 3       | 5       | 8       | 7    |
|                          | IPAB1.0 | 6  | 1       | 2       | 4       | 3       | 5       | 8       | 7    |
|                          | IPAB1.5 | 6  | 1       | 2       | 4       | 3       | 5       | 7       | 8    |
|                          | SBSB    | 6  | 1       | 2       | 4       | 3       | 5       | 8       | 7    |

Table S 17  $CW_{DCC}$  of RTFO aged bitumens at each failure point (28 °C).

|                          |         | $CW_{DCC}$ (T28 – RTFO aged bitumen) |           |           |           |           |           |           |           |
|--------------------------|---------|--------------------------------------|-----------|-----------|-----------|-----------|-----------|-----------|-----------|
|                          |         | NA                                   | STPB0.5   | STPB1.0   | STPB1.5   | IPAB0.5   | IPAB1.0   | IPAB1.5   | SBSB      |
| At the failure point of: | NA      | 1.313E+09                            | 1.447E+09 | 1.442E+09 | 1.381E+09 | 1.397E+09 | 1.298E+09 | 1.205E+09 | 1.248E+09 |
|                          | STPB0.5 | 1.494E+09                            | 1.668E+09 | 1.666E+09 | 1.595E+09 | 1.610E+09 | 1.466E+09 | 1.332E+09 | 1.433E+09 |
|                          | STPB1.0 | 1.459E+09                            | 1.624E+09 | 1.622E+09 | 1.552E+09 | 1.568E+09 | 1.434E+09 | 1.310E+09 | 1.397E+09 |
|                          | STPB1.5 | 1.406E+09                            | 1.558E+09 | 1.555E+09 | 1.489E+09 | 1.505E+09 | 1.385E+09 | 1.273E+09 | 1.341E+09 |
|                          | IPAB0.5 | 1.469E+09                            | 1.636E+09 | 1.634E+09 | 1.565E+09 | 1.580E+09 | 1.443E+09 | 1.316E+09 | 1.407E+09 |
|                          | IPAB1.0 | 1.263E+09                            | 1.385E+09 | 1.382E+09 | 1.323E+09 | 1.339E+09 | 1.251E+09 | 1.167E+09 | 1.198E+09 |
|                          | IPAB1.5 | 1.103E+09                            | 1.196E+09 | 1.194E+09 | 1.144E+09 | 1.159E+09 | 1.097E+09 | 1.051E+09 | 1.041E+09 |
|                          | SBSB    | 1.635E+09                            | 1.855E+09 | 1.853E+09 | 1.776E+09 | 1.789E+09 | 1.590E+09 | 1.411E+09 | 1.589E+09 |

Table S 18  $CW_{SPC}$  of RTFO aged bitumens at each failure point (28 °C).

|                          |         | $CW_{SPC}$ (T28 – RTFO aged bitumen) |           |           |           |           |           |           |           |
|--------------------------|---------|--------------------------------------|-----------|-----------|-----------|-----------|-----------|-----------|-----------|
|                          |         | NA                                   | STPB0.5   | STPB1.0   | STPB1.5   | IPAB0.5   | IPAB1.0   | IPAB1.5   | SBSB      |
| At the failure point of: | NA      | 1.209E+18                            | 1.379E+18 | 1.370E+18 | 1.311E+18 | 1.318E+18 | 1.161E+18 | 1.065E+18 | 1.151E+18 |
|                          | STPB0.5 | 1.651E+18                            | 1.911E+18 | 1.903E+18 | 1.802E+18 | 1.824E+18 | 1.601E+18 | 1.352E+18 | 1.599E+18 |
|                          | STPB1.0 | 1.559E+18                            | 1.797E+18 | 1.790E+18 | 1.699E+18 | 1.717E+18 | 1.511E+18 | 1.296E+18 | 1.503E+18 |
|                          | STPB1.5 | 1.424E+18                            | 1.631E+18 | 1.626E+18 | 1.549E+18 | 1.561E+18 | 1.370E+18 | 1.211E+18 | 1.365E+18 |
|                          | IPAB0.5 | 1.585E+18                            | 1.829E+18 | 1.822E+18 | 1.728E+18 | 1.747E+18 | 1.539E+18 | 1.312E+18 | 1.530E+18 |
|                          | IPAB1.0 | 1.103E+18                            | 1.253E+18 | 1.245E+18 | 1.194E+18 | 1.199E+18 | 1.066E+18 | 9.886E+17 | 1.046E+18 |
|                          | IPAB1.5 | 8.035E+17                            | 8.980E+17 | 8.976E+17 | 8.657E+17 | 8.672E+17 | 7.918E+17 | 7.591E+17 | 7.579E+17 |
|                          | SBSB    | 2.067E+18                            | 2.443E+18 | 2.438E+18 | 2.273E+18 | 2.324E+18 | 2.065E+18 | 1.573E+18 | 2.063E+18 |

Table S 19 Ranking of  $CW_{DCC}$  of RTFO aged bitumens respect to each failure point (28 °C).

|                |         | Ranking of $CW_{DCC}$ (T28 – RTFO aged bitumen) |         |         |         |         |         |         |      |
|----------------|---------|-------------------------------------------------|---------|---------|---------|---------|---------|---------|------|
|                |         | NA                                              | STPB0.5 | STPB1.0 | STPB1.5 | IPAB0.5 | IPAB1.0 | IPAB1.5 | SBSB |
| At the failure | NA      | 5                                               | 1       | 2       | 4       | 3       | 6       | 8       | 7    |
|                | STPB0.5 | 5                                               | 1       | 2       | 4       | 3       | 6       | 8       | 7    |

|           |         |   |   |   |   |   |   |   |   |
|-----------|---------|---|---|---|---|---|---|---|---|
| point of: | STPB1.0 | 5 | 1 | 2 | 4 | 3 | 6 | 8 | 7 |
|           | STPB1.5 | 5 | 1 | 2 | 4 | 3 | 6 | 8 | 7 |
|           | IPAB0.5 | 5 | 1 | 2 | 4 | 3 | 6 | 8 | 7 |
|           | IPAB1.0 | 5 | 1 | 2 | 4 | 3 | 6 | 8 | 7 |
|           | IPAB1.5 | 5 | 1 | 2 | 4 | 3 | 6 | 7 | 8 |
|           | SBSB    | 5 | 1 | 2 | 4 | 3 | 6 | 8 | 7 |

Table S 20 Ranking of  $CW_{SPC}$  of RTFO aged bitumens respect to each failure point (28 °C).

|                          |         | Ranking of $CW_{SPC}$ (T28 – RTFO aged bitumen) |         |         |         |         |         |         |      |
|--------------------------|---------|-------------------------------------------------|---------|---------|---------|---------|---------|---------|------|
|                          |         | NA                                              | STPB0.5 | STPB1.0 | STPB1.5 | IPAB0.5 | IPAB1.0 | IPAB1.5 | SBSB |
| At the failure point of: | NA      | 5                                               | 1       | 2       | 4       | 3       | 6       | 8       | 7    |
|                          | STPB0.5 | 5                                               | 1       | 2       | 4       | 3       | 6       | 8       | 7    |
|                          | STPB1.0 | 5                                               | 1       | 2       | 4       | 3       | 6       | 8       | 7    |
|                          | STPB1.5 | 5                                               | 1       | 2       | 4       | 3       | 6       | 8       | 7    |
|                          | IPAB0.5 | 5                                               | 1       | 2       | 4       | 3       | 6       | 8       | 7    |
|                          | IPAB1.0 | 5                                               | 1       | 2       | 4       | 3       | 6       | 8       | 7    |
|                          | IPAB1.5 | 5                                               | 1       | 2       | 4       | 3       | 6       | 7       | 8    |
|                          | SBSB    | 5                                               | 1       | 2       | 4       | 3       | 6       | 8       | 7    |

Table S 21  $CW_{DCC}$  of PAV aged bitumens at each failure point (28 °C).

|                          |         | $CW_{DCC}$ (T28 – PAV aged bitumen) |           |           |           |           |           |           |           |
|--------------------------|---------|-------------------------------------|-----------|-----------|-----------|-----------|-----------|-----------|-----------|
|                          |         | NA                                  | STPB0.5   | STPB1.0   | STPB1.5   | IPAB0.5   | IPAB1.0   | IPAB1.5   | SBSB      |
| At the failure point of: | NA      | 1.648E+09                           | 1.821E+09 | 1.804E+09 | 1.636E+09 | 1.818E+09 | 1.626E+09 | 1.421E+09 | 1.357E+09 |
|                          | STPB0.5 | 2.015E+09                           | 2.323E+09 | 2.285E+09 | 1.986E+09 | 2.319E+09 | 1.975E+09 | 1.591E+09 | 1.617E+09 |
|                          | STPB1.0 | 1.926E+09                           | 2.191E+09 | 2.160E+09 | 1.902E+09 | 2.188E+09 | 1.891E+09 | 1.565E+09 | 1.557E+09 |
|                          | STPB1.5 | 1.569E+09                           | 1.722E+09 | 1.708E+09 | 1.558E+09 | 1.719E+09 | 1.549E+09 | 1.370E+09 | 1.298E+09 |
|                          | IPAB0.5 | 2.038E+09                           | 2.358E+09 | 2.318E+09 | 2.007E+09 | 2.354E+09 | 1.996E+09 | 1.595E+09 | 1.632E+09 |
|                          | IPAB1.0 | 1.629E+09                           | 1.797E+09 | 1.781E+09 | 1.617E+09 | 1.794E+09 | 1.607E+09 | 1.409E+09 | 1.343E+09 |
|                          | IPAB1.5 | 1.333E+09                           | 1.439E+09 | 1.431E+09 | 1.327E+09 | 1.437E+09 | 1.319E+09 | 1.200E+09 | 1.118E+09 |
|                          | SBSB    | 1.786E+09                           | 2.000E+09 | 1.977E+09 | 1.769E+09 | 1.997E+09 | 1.759E+09 | 1.501E+09 | 1.458E+09 |

Table S 22  $CW_{SPC}$  of PAV aged bitumens at each failure point (28 °C).

|                          |         | $CW_{SPC}$ (T28 – PAV aged bitumen) |           |           |           |           |           |           |           |
|--------------------------|---------|-------------------------------------|-----------|-----------|-----------|-----------|-----------|-----------|-----------|
|                          |         | NA                                  | STPB0.5   | STPB1.0   | STPB1.5   | IPAB0.5   | IPAB1.0   | IPAB1.5   | SBSB      |
| At the failure point of: | NA      | 2.063E+18                           | 2.357E+18 | 2.342E+18 | 2.041E+18 | 2.349E+18 | 2.030E+18 | 1.687E+18 | 1.587E+18 |
|                          | STPB0.5 | 3.368E+18                           | 4.195E+18 | 4.066E+18 | 3.324E+18 | 4.189E+18 | 3.292E+18 | 2.289E+18 | 2.580E+18 |
|                          | STPB1.0 | 3.000E+18                           | 3.626E+18 | 3.546E+18 | 2.953E+18 | 3.617E+18 | 2.939E+18 | 2.299E+18 | 2.289E+18 |
|                          | STPB1.5 | 1.839E+18                           | 2.090E+18 | 2.071E+18 | 1.819E+18 | 2.080E+18 | 1.810E+18 | 1.542E+18 | 1.420E+18 |
|                          | IPAB0.5 | 3.469E+18                           | 4.367E+18 | 4.215E+18 | 3.427E+18 | 4.356E+18 | 3.389E+18 | 2.317E+18 | 2.663E+18 |

|         |           |           |           |           |           |           |           |           |
|---------|-----------|-----------|-----------|-----------|-----------|-----------|-----------|-----------|
| IPAB1.0 | 2.008E+18 | 2.291E+18 | 2.274E+18 | 1.984E+18 | 2.279E+18 | 1.975E+18 | 1.652E+18 | 1.545E+18 |
| IPAB1.5 | 1.266E+18 | 1.417E+18 | 1.402E+18 | 1.258E+18 | 1.411E+18 | 1.249E+18 | 1.129E+18 | 9.920E+17 |
| SBSB    | 2.497E+18 | 2.922E+18 | 2.882E+18 | 2.453E+18 | 2.910E+18 | 2.452E+18 | 1.934E+18 | 1.909E+18 |

Table S 23 Ranking of  $CW_{DCC}$  of PAV aged bitumens respect to each failure point (28 °C).

|                          |         | Ranking of $CW_{DCC}$ (T28 – PAV aged bitumen) |         |         |         |         |         |         |      |
|--------------------------|---------|------------------------------------------------|---------|---------|---------|---------|---------|---------|------|
|                          |         | NA                                             | STPB0.5 | STPB1.0 | STPB1.5 | IPAB0.5 | IPAB1.0 | IPAB1.5 | SBSB |
| At the failure point of: | NA      | 4                                              | 1       | 3       | 5       | 2       | 6       | 7       | 8    |
|                          | STPB0.5 | 4                                              | 1       | 3       | 5       | 2       | 6       | 8       | 7    |
|                          | STPB1.0 | 4                                              | 1       | 3       | 5       | 2       | 6       | 7       | 8    |
|                          | STPB1.5 | 4                                              | 1       | 3       | 5       | 2       | 6       | 7       | 8    |
|                          | IPAB0.5 | 4                                              | 1       | 3       | 5       | 2       | 6       | 8       | 7    |
|                          | IPAB1.0 | 4                                              | 1       | 3       | 5       | 2       | 6       | 7       | 8    |
|                          | IPAB1.5 | 4                                              | 1       | 3       | 5       | 2       | 6       | 7       | 8    |
|                          | SBSB    | 4                                              | 1       | 3       | 5       | 2       | 6       | 7       | 8    |

Table S 24 Ranking of  $CW_{SPC}$  of PAV aged bitumens respect to each failure point (28 °C).

|                          |         | Ranking of $CW_{SPC}$ (T28 – PAV aged bitumen) |         |         |         |         |         |         |      |
|--------------------------|---------|------------------------------------------------|---------|---------|---------|---------|---------|---------|------|
|                          |         | NA                                             | STPB0.5 | STPB1.0 | STPB1.5 | IPAB0.5 | IPAB1.0 | IPAB1.5 | SBSB |
| At the failure point of: | NA      | 4                                              | 1       | 3       | 5       | 2       | 6       | 7       | 8    |
|                          | STPB0.5 | 4                                              | 1       | 3       | 5       | 2       | 6       | 8       | 7    |
|                          | STPB1.0 | 4                                              | 1       | 3       | 5       | 2       | 6       | 7       | 8    |
|                          | STPB1.5 | 4                                              | 1       | 3       | 5       | 2       | 6       | 7       | 8    |
|                          | IPAB0.5 | 4                                              | 1       | 3       | 5       | 2       | 6       | 8       | 7    |
|                          | IPAB1.0 | 4                                              | 1       | 3       | 5       | 2       | 6       | 7       | 8    |
|                          | IPAB1.5 | 4                                              | 1       | 3       | 5       | 2       | 6       | 7       | 8    |
|                          | SBSB    | 4                                              | 1       | 3       | 5       | 2       | 6       | 7       | 8    |

Table S 25  $CW_{DCC}$  of unaged bitumens at each failure point (31 °C).

|                          |         | $CW_{DCC}$ (T31 – unaged bitumen) |           |           |           |           |           |           |           |
|--------------------------|---------|-----------------------------------|-----------|-----------|-----------|-----------|-----------|-----------|-----------|
|                          |         | NA                                | STPB0.5   | STPB1.0   | STPB1.5   | IPAB0.5   | IPAB1.0   | IPAB1.5   | SBSB      |
| At the failure point of: | NA      | 1.304E+08                         | 1.563E+08 | 1.558E+08 | 1.427E+08 | 1.551E+08 | 1.407E+08 | 1.270E+08 | 1.542E+08 |
|                          | STPB0.5 | 1.938E+08                         | 2.648E+08 | 2.584E+08 | 2.271E+08 | 2.562E+08 | 2.227E+08 | 1.814E+08 | 2.796E+08 |
|                          | STPB1.0 | 1.901E+08                         | 2.564E+08 | 2.502E+08 | 2.211E+08 | 2.481E+08 | 2.169E+08 | 1.787E+08 | 2.690E+08 |
|                          | STPB1.5 | 1.562E+08                         | 1.988E+08 | 1.985E+08 | 1.744E+08 | 1.968E+08 | 1.717E+08 | 1.504E+08 | 1.975E+08 |
|                          | IPAB0.5 | 1.920E+08                         | 2.606E+08 | 2.543E+08 | 2.241E+08 | 2.522E+08 | 2.198E+08 | 1.801E+08 | 2.743E+08 |
|                          | IPAB1.0 | 1.540E+08                         | 1.945E+08 | 1.941E+08 | 1.717E+08 | 1.862E+08 | 1.690E+08 | 1.485E+08 | 1.938E+08 |
|                          | IPAB1.5 | 1.200E+08                         | 1.419E+08 | 1.416E+08 | 1.304E+08 | 1.411E+08 | 1.287E+08 | 1.173E+08 | 1.407E+08 |
|                          | SBSB    | 1.103E+08                         | 4.031E+08 | 3.894E+08 | 2.461E+08 | 3.863E+08 | 2.348E+08 | 3.640E+07 | 5.792E+08 |

Table S 26  $CW_{SPC}$  of unaged bitumens at each failure point (31 °C).

|                          |         | $CW_{SPC}$ (T31 – unaged bitumen) |           |           |           |           |           |           |           |
|--------------------------|---------|-----------------------------------|-----------|-----------|-----------|-----------|-----------|-----------|-----------|
|                          |         | NA                                | STPB0.5   | STPB1.0   | STPB1.5   | IPAB0.5   | IPAB1.0   | IPAB1.5   | SBSB      |
| At the failure point of: | NA      | 1.185E+16                         | 1.646E+16 | 1.606E+16 | 1.242E+16 | 1.582E+16 | 1.209E+16 | 1.047E+16 | 1.435E+16 |
|                          | STPB0.5 | 2.739E+16                         | 4.920E+16 | 4.812E+16 | 3.368E+16 | 4.736E+16 | 3.236E+16 | 2.273E+16 | 5.019E+16 |
|                          | STPB1.0 | 2.630E+16                         | 4.599E+16 | 4.500E+16 | 3.181E+16 | 4.428E+16 | 3.060E+16 | 2.197E+16 | 4.617E+16 |
|                          | STPB1.5 | 1.742E+16                         | 2.605E+16 | 2.546E+16 | 1.911E+16 | 2.359E+16 | 1.852E+16 | 1.512E+16 | 2.375E+16 |
|                          | IPAB0.5 | 2.685E+16                         | 4.758E+16 | 4.655E+16 | 3.274E+16 | 4.581E+16 | 3.148E+16 | 2.236E+16 | 4.814E+16 |
|                          | IPAB1.0 | 1.691E+16                         | 2.511E+16 | 2.454E+16 | 1.847E+16 | 2.261E+16 | 1.791E+16 | 1.470E+16 | 2.279E+16 |
|                          | IPAB1.5 | 9.922E+15                         | 1.346E+16 | 1.311E+16 | 1.024E+16 | 1.293E+16 | 9.986E+15 | 8.811E+15 | 1.157E+16 |
|                          | SBSB    | 9.358E+16                         | 1.236E+17 | 1.179E+17 | 9.997E+16 | 1.170E+17 | 9.985E+16 | 8.716E+16 | 2.541E+17 |

Table S 27 Ranking of  $CW_{DCC}$  of unaged bitumens respect to each failure point (31 °C).

|                          |         | Ranking of $CW_{DCC}$ (T31 – unaged bitumen) |         |         |         |         |         |         |      |
|--------------------------|---------|----------------------------------------------|---------|---------|---------|---------|---------|---------|------|
|                          |         | NA                                           | STPB0.5 | STPB1.0 | STPB1.5 | IPAB0.5 | IPAB1.0 | IPAB1.5 | SBSB |
| At the failure point of: | NA      | 7                                            | 1       | 2       | 5       | 3       | 6       | 8       | 4    |
|                          | STPB0.5 | 7                                            | 2       | 3       | 5       | 4       | 6       | 8       | 1    |
|                          | STPB1.0 | 7                                            | 2       | 3       | 5       | 4       | 6       | 8       | 1    |
|                          | STPB1.5 | 7                                            | 1       | 2       | 5       | 4       | 6       | 8       | 3    |
|                          | IPAB0.5 | 7                                            | 2       | 3       | 5       | 4       | 6       | 8       | 1    |
|                          | IPAB1.0 | 7                                            | 1       | 2       | 5       | 4       | 6       | 8       | 3    |
|                          | IPAB1.5 | 7                                            | 1       | 2       | 5       | 3       | 6       | 8       | 4    |
|                          | SBSB    | 7                                            | 2       | 3       | 5       | 4       | 6       | 8       | 1    |

Table S 28 Ranking of  $CW_{SPC}$  of unaged bitumens respect to each failure point (31 °C).

|                          |         | Ranking of $CW_{SPC}$ (T31 – unaged bitumen) |         |         |         |         |         |         |      |
|--------------------------|---------|----------------------------------------------|---------|---------|---------|---------|---------|---------|------|
|                          |         | NA                                           | STPB0.5 | STPB1.0 | STPB1.5 | IPAB0.5 | IPAB1.0 | IPAB1.5 | SBSB |
| At the failure point of: | NA      | 7                                            | 1       | 2       | 5       | 3       | 6       | 8       | 4    |
|                          | STPB0.5 | 7                                            | 2       | 3       | 5       | 4       | 6       | 8       | 1    |
|                          | STPB1.0 | 7                                            | 2       | 3       | 5       | 4       | 6       | 8       | 1    |
|                          | STPB1.5 | 7                                            | 1       | 2       | 5       | 4       | 6       | 8       | 3    |
|                          | IPAB0.5 | 7                                            | 2       | 3       | 5       | 4       | 6       | 8       | 1    |
|                          | IPAB1.0 | 7                                            | 1       | 2       | 5       | 4       | 6       | 8       | 3    |
|                          | IPAB1.5 | 7                                            | 1       | 2       | 5       | 3       | 6       | 8       | 4    |
|                          | SBSB    | 7                                            | 2       | 3       | 5       | 4       | 6       | 8       | 1    |

Table S 29  $CW_{DCC}$  of RTFO aged bitumens at each failure point (31 °C).

|                          |         | $CW_{DCC}$ (T31 – RTFO aged bitumen) |           |           |           |           |           |           |           |
|--------------------------|---------|--------------------------------------|-----------|-----------|-----------|-----------|-----------|-----------|-----------|
|                          |         | NA                                   | STPB0.5   | STPB1.0   | STPB1.5   | IPAB0.5   | IPAB1.0   | IPAB1.5   | SBSB      |
| At the failure point of: | NA      | 2.953E+08                            | 3.183E+08 | 3.175E+08 | 3.105E+08 | 3.086E+08 | 2.947E+08 | 2.783E+08 | 2.933E+08 |
|                          | STPB0.5 | 3.519E+08                            | 3.821E+08 | 3.810E+08 | 3.701E+08 | 3.684E+08 | 3.473E+08 | 3.224E+08 | 3.534E+08 |
|                          | STPB1.0 | 3.465E+08                            | 3.755E+08 | 3.745E+08 | 3.640E+08 | 3.623E+08 | 3.420E+08 | 3.181E+08 | 3.471E+08 |
|                          | STPB1.5 | 3.343E+08                            | 3.612E+08 | 3.602E+08 | 3.508E+08 | 3.489E+08 | 3.304E+08 | 3.086E+08 | 3.335E+08 |
|                          | IPAB0.5 | 3.461E+08                            | 3.756E+08 | 3.746E+08 | 3.641E+08 | 3.624E+08 | 3.421E+08 | 3.182E+08 | 3.472E+08 |
|                          | IPAB1.0 | 3.242E+08                            | 3.490E+08 | 3.481E+08 | 3.394E+08 | 3.375E+08 | 3.205E+08 | 3.003E+08 | 3.221E+08 |
|                          | IPAB1.5 | 2.937E+08                            | 3.161E+08 | 3.153E+08 | 3.085E+08 | 3.066E+08 | 2.929E+08 | 2.767E+08 | 2.913E+08 |
|                          | SBSB    | 3.866E+08                            | 4.332E+08 | 4.318E+08 | 4.164E+08 | 4.153E+08 | 3.862E+08 | 3.520E+08 | 4.032E+08 |

Table S 30  $CW_{SPC}$  of RTFO aged bitumens at each failure point (31 °C).

|                          |         | $CW_{SPC}$ (T31 – RTFO aged bitumen) |           |           |           |           |           |           |           |
|--------------------------|---------|--------------------------------------|-----------|-----------|-----------|-----------|-----------|-----------|-----------|
|                          |         | NA                                   | STPB0.5   | STPB1.0   | STPB1.5   | IPAB0.5   | IPAB1.0   | IPAB1.5   | SBSB      |
| At the failure point of: | NA      | 5.879E+16                            | 6.481E+16 | 6.474E+16 | 6.271E+16 | 6.142E+16 | 5.863E+16 | 5.224E+16 | 5.834E+16 |
|                          | STPB0.5 | 8.581E+16                            | 9.737E+16 | 9.704E+16 | 9.310E+16 | 9.155E+16 | 8.556E+16 | 7.479E+16 | 8.925E+16 |
|                          | STPB1.0 | 8.291E+16                            | 9.367E+16 | 9.338E+16 | 8.969E+16 | 8.814E+16 | 8.259E+16 | 7.237E+16 | 8.563E+16 |
|                          | STPB1.5 | 7.823E+16                            | 8.587E+16 | 8.566E+16 | 8.246E+16 | 8.095E+16 | 7.625E+16 | 6.714E+16 | 7.810E+16 |
|                          | IPAB0.5 | 8.299E+16                            | 9.370E+16 | 9.342E+16 | 8.972E+16 | 8.817E+16 | 8.262E+16 | 7.239E+16 | 8.567E+16 |
|                          | IPAB1.0 | 7.231E+16                            | 7.956E+16 | 7.940E+16 | 7.657E+16 | 7.511E+16 | 7.104E+16 | 6.279E+16 | 7.210E+16 |
|                          | IPAB1.5 | 5.788E+16                            | 6.383E+16 | 6.376E+16 | 6.178E+16 | 6.051E+16 | 5.779E+16 | 5.153E+16 | 5.744E+16 |
|                          | SBSB    | 1.101E+17                            | 1.287E+17 | 1.279E+17 | 1.254E+17 | 1.238E+17 | 1.096E+17 | 9.349E+16 | 1.217E+17 |

Table S 31 Ranking of  $CW_{DCC}$  of RTFO aged bitumens respect to each failure point (31 °C).

|                          |         | Ranking of $CW_{DCC}$ (T31 – RTFO aged bitumen) |         |         |         |         |         |         |      |
|--------------------------|---------|-------------------------------------------------|---------|---------|---------|---------|---------|---------|------|
|                          |         | NA                                              | STPB0.5 | STPB1.0 | STPB1.5 | IPAB0.5 | IPAB1.0 | IPAB1.5 | SBSB |
| At the failure point of: | NA      | 5                                               | 1       | 2       | 3       | 4       | 6       | 8       | 7    |
|                          | STPB0.5 | 6                                               | 1       | 2       | 3       | 4       | 7       | 8       | 5    |
|                          | STPB1.0 | 6                                               | 1       | 2       | 3       | 4       | 7       | 8       | 5    |
|                          | STPB1.5 | 5                                               | 1       | 2       | 3       | 4       | 7       | 8       | 6    |
|                          | IPAB0.5 | 6                                               | 1       | 2       | 3       | 4       | 7       | 8       | 5    |
|                          | IPAB1.0 | 5                                               | 1       | 2       | 3       | 4       | 7       | 8       | 6    |
|                          | IPAB1.5 | 5                                               | 1       | 2       | 3       | 4       | 6       | 8       | 7    |
|                          | SBSB    | 6                                               | 1       | 2       | 3       | 4       | 7       | 8       | 5    |

Table S 32 Ranking of  $CW_{SPC}$  of RTFO aged bitumens respect to each failure point (31 °C).

|  |  | Ranking of $CW_{SPC}$ (T31 – RTFO aged bitumen) |         |         |         |         |         |         |      |
|--|--|-------------------------------------------------|---------|---------|---------|---------|---------|---------|------|
|  |  | NA                                              | STPB0.5 | STPB1.0 | STPB1.5 | IPAB0.5 | IPAB1.0 | IPAB1.5 | SBSB |



|                          |         |   |   |   |   |   |   |   |   |
|--------------------------|---------|---|---|---|---|---|---|---|---|
| At the failure point of: | NA      | 5 | 1 | 2 | 3 | 4 | 6 | 8 | 7 |
|                          | STPB0.5 | 6 | 1 | 2 | 3 | 4 | 7 | 8 | 5 |
|                          | STPB1.0 | 6 | 1 | 2 | 3 | 4 | 7 | 8 | 5 |
|                          | STPB1.5 | 5 | 1 | 2 | 3 | 4 | 7 | 8 | 6 |
|                          | IPAB0.5 | 6 | 1 | 2 | 3 | 4 | 7 | 8 | 5 |
|                          | IPAB1.0 | 5 | 1 | 2 | 3 | 4 | 7 | 8 | 6 |
|                          | IPAB1.5 | 5 | 1 | 2 | 3 | 4 | 6 | 8 | 7 |
|                          | SBSB    | 6 | 1 | 2 | 3 | 4 | 7 | 8 | 5 |

Table S 33  $CW_{DCC}$  of PAV aged bitumens at each failure point (31 °C).

|                          |         | $CW_{DCC}$ (T31 – PAV aged bitumen) |           |           |           |           |           |           |           |
|--------------------------|---------|-------------------------------------|-----------|-----------|-----------|-----------|-----------|-----------|-----------|
|                          |         | NA                                  | STPB0.5   | STPB1.0   | STPB1.5   | IPAB0.5   | IPAB1.0   | IPAB1.5   | SBSB      |
| At the failure point of: | NA      | 3.552E+08                           | 4.114E+08 | 4.153E+08 | 3.731E+08 | 4.110E+08 | 3.749E+08 | 3.339E+08 | 3.133E+08 |
|                          | STPB0.5 | 4.323E+08                           | 5.403E+08 | 5.483E+08 | 4.726E+08 | 5.397E+08 | 4.767E+08 | 4.020E+08 | 3.879E+08 |
|                          | STPB1.0 | 4.348E+08                           | 5.458E+08 | 5.540E+08 | 4.764E+08 | 5.451E+08 | 4.807E+08 | 4.042E+08 | 3.907E+08 |
|                          | STPB1.5 | 3.689E+08                           | 4.315E+08 | 4.358E+08 | 3.894E+08 | 4.310E+08 | 3.915E+08 | 3.462E+08 | 3.259E+08 |
|                          | IPAB0.5 | 4.336E+08                           | 5.432E+08 | 5.513E+08 | 4.746E+08 | 5.426E+08 | 4.788E+08 | 4.031E+08 | 3.894E+08 |
|                          | IPAB1.0 | 3.938E+08                           | 4.702E+08 | 4.756E+08 | 4.201E+08 | 4.697E+08 | 4.228E+08 | 3.684E+08 | 3.492E+08 |
|                          | IPAB1.5 | 3.334E+08                           | 3.809E+08 | 3.840E+08 | 3.479E+08 | 3.805E+08 | 3.493E+08 | 3.141E+08 | 2.936E+08 |
|                          | SBSB    | 4.098E+08                           | 4.974E+08 | 5.037E+08 | 4.410E+08 | 4.968E+08 | 4.442E+08 | 3.826E+08 | 3.648E+08 |

Table S 34  $CW_{SPC}$  of PAV aged bitumens at each failure point (31 °C).

|                          |         | $CW_{SPC}$ (T31 – PAV aged bitumen) |           |           |           |           |           |           |           |
|--------------------------|---------|-------------------------------------|-----------|-----------|-----------|-----------|-----------|-----------|-----------|
|                          |         | NA                                  | STPB0.5   | STPB1.0   | STPB1.5   | IPAB0.5   | IPAB1.0   | IPAB1.5   | SBSB      |
| At the failure point of: | NA      | 9.206E+16                           | 1.154E+17 | 1.161E+17 | 1.000E+17 | 1.146E+17 | 1.021E+17 | 8.542E+16 | 8.042E+16 |
|                          | STPB0.5 | 1.525E+17                           | 2.170E+17 | 2.213E+17 | 1.740E+17 | 2.158E+17 | 1.822E+17 | 1.458E+17 | 1.421E+17 |
|                          | STPB1.0 | 1.552E+17                           | 2.219E+17 | 2.269E+17 | 1.774E+17 | 2.211E+17 | 1.861E+17 | 1.481E+17 | 1.452E+17 |
|                          | STPB1.5 | 1.008E+17                           | 1.288E+17 | 1.296E+17 | 1.104E+17 | 1.277E+17 | 1.130E+17 | 9.331E+16 | 8.876E+16 |
|                          | IPAB0.5 | 1.540E+17                           | 2.193E+17 | 2.243E+17 | 1.758E+17 | 2.186E+17 | 1.842E+17 | 1.461E+17 | 1.438E+17 |
|                          | IPAB1.0 | 1.185E+17                           | 1.568E+17 | 1.583E+17 | 1.318E+17 | 1.556E+17 | 1.357E+17 | 1.088E+17 | 1.061E+17 |
|                          | IPAB1.5 | 7.928E+16                           | 9.634E+16 | 9.737E+16 | 8.509E+16 | 9.623E+16 | 8.656E+16 | 7.380E+16 | 6.856E+16 |
|                          | SBSB    | 1.314E+17                           | 1.789E+17 | 1.810E+17 | 1.477E+17 | 1.774E+17 | 1.529E+17 | 1.198E+17 | 1.193E+17 |

Table S 35 Ranking of  $CW_{DCC}$  of PAV aged bitumens respect to each failure point (31 °C).

|                |         | Ranking of $CW_{DCC}$ (T31 – PAV aged bitumen) |         |         |         |         |         |         |      |
|----------------|---------|------------------------------------------------|---------|---------|---------|---------|---------|---------|------|
|                |         | NA                                             | STPB0.5 | STPB1.0 | STPB1.5 | IPAB0.5 | IPAB1.0 | IPAB1.5 | SBSB |
| At the failure | NA      | 6                                              | 2       | 1       | 5       | 3       | 4       | 7       | 8    |
|                | STPB0.5 | 6                                              | 2       | 1       | 5       | 3       | 4       | 7       | 8    |
|                | STPB1.0 | 6                                              | 2       | 1       | 5       | 3       | 4       | 7       | 8    |

|           |         |   |   |   |   |   |   |   |   |
|-----------|---------|---|---|---|---|---|---|---|---|
| point of: | STPB1.5 | 6 | 2 | 1 | 5 | 3 | 4 | 7 | 8 |
|           | IPAB0.5 | 6 | 2 | 1 | 5 | 3 | 4 | 7 | 8 |
|           | IPAB1.0 | 6 | 2 | 1 | 5 | 3 | 4 | 7 | 8 |
|           | IPAB1.5 | 6 | 2 | 1 | 5 | 3 | 4 | 7 | 8 |
|           | SBSB    | 6 | 2 | 1 | 5 | 3 | 4 | 7 | 8 |

Table S 36 Ranking of  $CW_{SPC}$  of PAV aged bitumens respect to each failure point (31 °C).

|                          |         | Ranking of $CW_{SPC}$ (T31 – PAV aged bitumen) |         |         |         |         |         |         |      |
|--------------------------|---------|------------------------------------------------|---------|---------|---------|---------|---------|---------|------|
|                          |         | NA                                             | STPB0.5 | STPB1.0 | STPB1.5 | IPAB0.5 | IPAB1.0 | IPAB1.5 | SBSB |
| At the failure point of: | NA      | 6                                              | 2       | 1       | 5       | 3       | 4       | 7       | 8    |
|                          | STPB0.5 | 6                                              | 2       | 1       | 5       | 3       | 4       | 7       | 8    |
|                          | STPB1.0 | 6                                              | 2       | 1       | 5       | 3       | 4       | 7       | 8    |
|                          | STPB1.5 | 6                                              | 2       | 1       | 5       | 3       | 4       | 7       | 8    |
|                          | IPAB0.5 | 6                                              | 2       | 1       | 5       | 3       | 4       | 7       | 8    |
|                          | IPAB1.0 | 6                                              | 2       | 1       | 5       | 3       | 4       | 7       | 8    |
|                          | IPAB1.5 | 6                                              | 2       | 1       | 5       | 3       | 4       | 7       | 8    |
|                          | SBSB    | 6                                              | 2       | 1       | 5       | 3       | 4       | 7       | 8    |

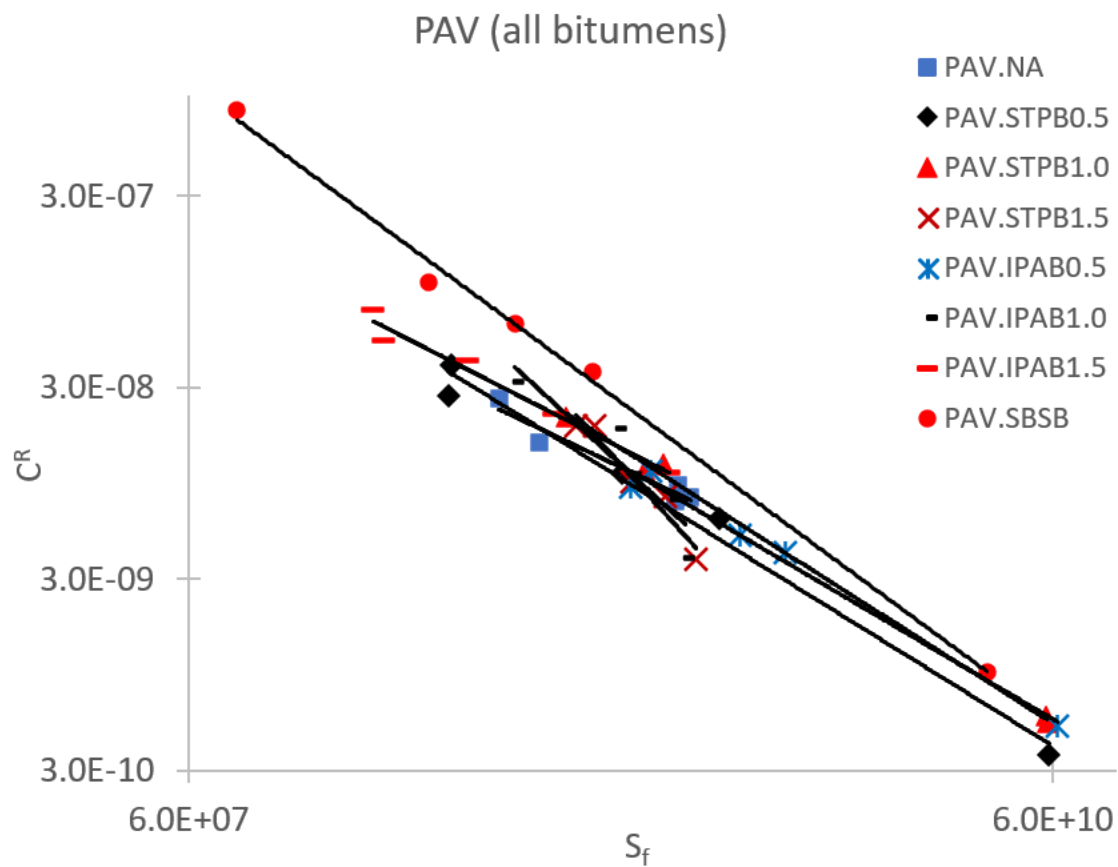

Figure. S 12  $C^R$  vs  $S_f$  graph of all PAV aged bitumens.
